# Supplementary material for: A Ru-catalyzed one-pot synthesis of homopropargylic amines from alkyl azides under photolytic conditions
Source: Royal Society of Chemistry journal article supplement (doi:10.1039/c4ra02941k), 2014-01-01
Supplement: c4ra02941k1.pdf [file c4ra02941k1.pdf]

## Supporting Information

### A Ru-Catalyzed One-pot Synthesis of Homopropargylic Amines from Alkyl Azides under Photolytic Conditions

Wook Jeong, Ji Hyung Lee, Jungjoon Kim, Won Jong Lee, Ju Hwa Seong, Jaiwook Park\*  
and Young Ho Rhee\*

Department of Chemistry, POSTECH (Pohang University of Science and Technology),  
Hyoja-dong, San 31, Pohang, Kyungbuk 790-784, Republic of Korea.

#### Table of Contents

|      |                                                               |    |
|------|---------------------------------------------------------------|----|
| I.   | General information .....                                     | 2  |
| II.  | General procedure for the homopropargylation .....            | 2  |
| III. | Representative procedure for the preparation of azide .....   | 7  |
| IV.  | Assignment of the stereochemistry of <b>24</b> .....          | 10 |
| V.   | Synthesis of 2,6-dialkyl-4-hydroxy-piperidine <b>26</b> ..... | 11 |
| VI.  | References .....                                              | 12 |
| VII. | <sup>1</sup> H- and <sup>13</sup> C-NMR spectra .....         | 13 |

## I. General information:

All solvents were dried and distilled according to the standard methods before use. Ruthenium catalysts **1** were synthesized according to the literature procedure.<sup>1</sup> AgSbF<sub>6</sub> were purchased from Aldrich Chemicals and stored in a dry-keeper. Au{P(C<sub>6</sub>F<sub>5</sub>)<sub>3</sub>}Cl was prepared according to the literature procedures.<sup>2</sup> Syntheses of homopropargylamines and imines were performed in a flame-dried J-young flask under nitrogen atmosphere. Reactions were monitored by thin-layer chromatography carried out on 0.25 mm E. Merck silica gel plates (60F-254) using UV light as a visualizing agent and acidic *p*-anisaldehyde, PMA, ninhydrin and heat as developing agents. Flash chromatography was carried out on Merck 60 silica gel (230-400 mesh). Preparative thin-layer chromatography (PTLC) was carried out using silica gel 60 F<sub>254</sub> on PLC plate purchased from Merck (1mm x 20 cm x 20 cm). <sup>1</sup>H and <sup>13</sup>C NMR spectra were recorded with Bruker (300 MHz and 500 MHz) spectrometer. <sup>1</sup>H NMR spectra were referenced to residual CDCl<sub>3</sub> (7.26 ppm) and reported as follows; chemical shift, multiplicity (s = singlet, d = doublet, t = triplet, q = quartet, quint = quintet, m = multiplet). Chemical shifts of <sup>13</sup>C NMR spectra were measured relative to CDCl<sub>3</sub> (77.23 ppm). Mass spectral data were obtained from the Korea Basic Science Institute (Daegu) on a Jeol JMS 700 high resolution mass spectrometer. Infrared spectra were recorded on a Shimadzu IR-470 spectrometer.

## II. General procedure for the homopropargylation

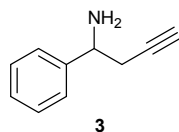

The ruthenium catalyst **1** (2.6 mg, 0.0025 mmol) was introduced to a flame-dried J-young flask. The flask was filled with N<sub>2</sub> gas. Then THF (0.5 mL) was added to the J-young flask under N<sub>2</sub> gas flow condition. The solution was stirred at room temperature for 10 min without light to dissolve **1**. Then benzyl azide **2** (33.3 mg, 0.25 mmol) in THF (0.5 mL) and allenylboronic acid pinacol ester (134 μL, 0.75 mmol) were added to the solution under N<sub>2</sub> gas flow condition. The reaction mixture was stirred at 50 °C under the 30 W fluorescent light for 3 h. The reaction was quenched by adding CHCl<sub>3</sub> (1 mL). 1N HCl was added to the solution to make pH ~ 1. The solution was washed with Et<sub>2</sub>O (3 x 5 mL) and neutralized by 6

N NaOH. The solution was extracted with Et<sub>2</sub>O (5 x 5 mL), dried over Na<sub>2</sub>SO<sub>4</sub>, filtered and concentrated under reduced pressure. The residue oil was purified by preparative TLC eluting with hexane: isopropylamine = 95: 5 to give **3** as yellow oil (29.5 mg, 0.21 mmol, 81% yield). R<sub>f</sub> = 0.64 (CH<sub>2</sub>Cl<sub>2</sub>: MeOH = 90:10). <sup>1</sup>H NMR (300 MHz, CDCl<sub>3</sub>): δ = 2.07 (t, *J* = 2.6 Hz, 1H), 2.37 (br s, 2H), 2.54 (ddd, *J* = 16.6, 7.8, 2.6 Hz, 1H), 2.64 (ddd, *J* = 16.6, 5.3, 2.6 Hz, 1H), 4.20 (dd, *J* = 7.8, 5.3 Hz, 1H), 7.43-7.28 (m, 5H); <sup>13</sup>C NMR (75 MHz, CDCl<sub>3</sub>): δ = 29.5, 54.9, 70.9, 81.6, 126.5, 127.8, 128.8, 143.8; IR: (cm<sup>-1</sup>) ν 3293, 2926, 2855, 1557, 1455, 1384; HRMS(FAB+) calcd for C<sub>10</sub>H<sub>12</sub>N: 146.0970, found: 146.0970.

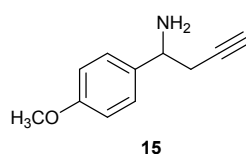

Using the representative procedure, a mixture of **5** (40.8 mg, 0.25 mmol), ruthenium catalyst **1** (5.1 mg, 0.005 mmol) and allenylboronic acid pinacol ester (134 μL, 0.75 mmol) were reacted at 50 °C under 30W fluorescent light for 4 h to give **15** as pale yellow oil (30.5 mg, 0.174 mmol, 70% yield). R<sub>f</sub> = 0.60 (CH<sub>2</sub>Cl<sub>2</sub>: MeOH = 90:10).

<sup>1</sup>H NMR (300 MHz, CDCl<sub>3</sub>): δ = 1.70 (br s, 2H), 2.04 (t, *J* = 2.7 Hz, 1H), 2.46 (ddd, *J* = 16.5, 8.1, 2.7 Hz, 1H), 2.56 (ddd, *J* = 16.5, 5.1, 2.7 Hz, 1H), 3.80 (s, 3H), 4.13 (dd, *J* = 8.0, 5.3 Hz, 1H), 6.84-6.92 (m, 2H), 7.27-7.35 (m, 2H); <sup>13</sup>C NMR (75 MHz, CDCl<sub>3</sub>): δ = 30.0, 54.3, 55.5, 70.6, 82.1, 114.0, 127.5, 136.7, 159.1; IR: (cm<sup>-1</sup>) ν 3290, 2925, 2855, 1663, 1611, 1512, 1369, 1302, 1247, 1176, 1109, 1034; HRMS(FAB+) calcd for C<sub>11</sub>H<sub>13</sub>NO: 176.1075, found: 176.1077.

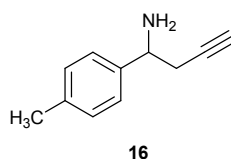

Using the representative procedure, a mixture of **6** (36.8 mg, 0.25 mmol), ruthenium catalyst **1** (5.1 mg, 0.005 mmol) and allenylboronic acid pinacol ester (134 μL, 0.75 mmol) were reacted at 50 °C under 30W fluorescent light for 6 h to give **16** as yellow oil (25.8 mg, 0.163 mmol, 65% yield). R<sub>f</sub> = 0.65 (CH<sub>2</sub>Cl<sub>2</sub>: MeOH = 90:10).

<sup>1</sup>H NMR (300 MHz, CDCl<sub>3</sub>): δ = 1.94 (br s, 2H), 2.04 (t, *J* = 2.6 Hz, 1H), 2.34 (s, 3H), 2.47 (ddd, *J* = 16.6, 8.0, 2.6 Hz, 1H), 2.58 (ddd, *J* = 16.6, 5.1, 2.6 Hz, 1H), 4.13 (dd, *J* = 7.9, 5.1

Hz, 1H), 7.15 (d,  $J = 7.9$  Hz, 2H), 7.26 (d,  $J = 8.1$  Hz, 2H);  $^{13}\text{C}$  NMR (75 MHz,  $\text{CDCl}_3$ ):  $\delta = 21.3, 29.9, 54.6, 70.6, 82.0, 126.3, 129.4, 137.3, 141.6$ ; IR: ( $\text{cm}^{-1}$ )  $\nu$  3292, 2925, 1515, 1458; HRMS(FAB+) calcd for  $\text{C}_{11}\text{H}_{14}\text{N}$ : 160.1126, found: 160.1128.

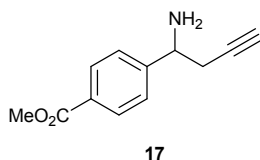

Using the representative procedure, a mixture of **7** (47.8 mg, 0.25 mmol), ruthenium catalyst **1** (5.1 mg, 0.005 mmol) and allenylboronic acid pinacol ester (134  $\mu\text{L}$ , 0.75 mmol) were reacted at 50  $^\circ\text{C}$  under 30W fluorescent light for 6 h to give **17** as yellow oil (38.6 mg, 0.190 mmol, 76% yield).  $R_f = 0.67$  ( $\text{CH}_2\text{Cl}_2$ : MeOH = 90:10).

$^1\text{H}$  NMR (300 MHz,  $\text{CDCl}_3$ ):  $\delta = 1.93\text{-}1.98$  (br s, 2H), 2.04 (t,  $J = 2.6$  Hz, 1H), 2.49 (ddd,  $J = 16.6, 7.7, 2.6$  Hz, 1H), 2.60 (ddd,  $J = 16.6, 5.2, 2.6$  Hz, 1H), 3.90 (s, 3H), 4.22 (dd,  $J = 7.6, 5.3$  Hz, 1H), 7.46 (d,  $J = 8.2$  Hz, 2H), 8.01 (d,  $J = 8.4$  Hz, 2H);  $^{13}\text{C}$  NMR (75 MHz,  $\text{CDCl}_3$ ):  $\delta = 29.7, 52.3, 54.7, 71.1, 81.2, 126.6, 129.6, 130.1, 149.5, 167.1$ ; IR: ( $\text{cm}^{-1}$ )  $\nu$  3293, 2952, 1721, 1281, 1113; HRMS(FAB+) calcd for  $\text{C}_{12}\text{H}_{14}\text{NO}_2$ : 204.1025, found: 204.1025.

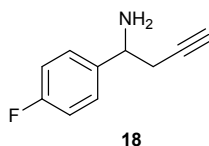

Using the representative procedure, a mixture of **8** (37.8 mg, 0.25 mmol), ruthenium catalyst **1** (7.6 mg, 0.0075 mmol) and allenylboronic acid pinacol ester (134  $\mu\text{L}$ , 0.75 mmol) were reacted at 50  $^\circ\text{C}$  under 30W fluorescent light for 12 h to give **18** as pale yellow oil (27.7 mg, 0.170 mmol, 68% yield).  $R_f = 0.51$  ( $\text{CH}_2\text{Cl}_2$ : MeOH = 90:10).

$^1\text{H}$  NMR (300 MHz,  $\text{CDCl}_3$ ):  $\delta = 1.71$  (br s, 2H), 2.04 (t,  $J = 2.7$  Hz, 1H), 2.45 (ddd,  $J = 16.5, 7.8, 2.6$  Hz, 1H), 2.55 (ddd,  $J = 16.5, 5.1, 2.6$  Hz, 1H), 4.15 (dd,  $J = 7.7, 5.3$  Hz, 1H), 6.97-7.07 (m, 2H), 7.31-7.40 (m, 2H);  $^{13}\text{C}$  NMR (75 MHz,  $\text{CDCl}_3$ ):  $\delta = 30.0, 54.2, 70.8, 81.6, 115.4$  (d,  $J = 21.2$  Hz), 128.0 (d,  $J = 8.0$  Hz), 140.2 (d,  $J = 3.1$  Hz), 162.3 (d,  $J = 243.8$  Hz); IR: ( $\text{cm}^{-1}$ )  $\nu$  3375, 3301, 2930, 1603, 1510, 1420, 1374, 1221, 1157, 1096, 1014; HRMS(FAB+) calcd for  $\text{C}_{10}\text{H}_{10}\text{FN}$ : 164.0876, found: 164.0872.

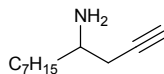

19

Using the representative procedure, a mixture of **9** (38.8 mg, 0.25 mmol), ruthenium catalyst **1** (5.1 mg, 0.005 mmol) and allenylboronic acid pinacol ester (134  $\mu$ L, 0.75 mmol) were reacted at 50 °C under 30W fluorescent light for 12 h to give **19** as yellow oil (31.7 mg, 0.190 mmol, 76% yield).  $R_f = 0.47$  ( $\text{CH}_2\text{Cl}_2$ : MeOH = 90:10).

$^1\text{H}$  NMR (300 MHz,  $\text{CDCl}_3$ ):  $\delta = 0.87$  (t,  $J = 6.7$  Hz, 3H), 1.20-1.46 (m, 12H), 1.55 (br s, 2H), 2.00 (t,  $J = 2.6$  Hz, 1H), 2.16 (ddd,  $J = 16.6, 7.1, 2.7$  Hz, 1H), 2.33 (ddd,  $J = 16.6, 4.7, 2.6$  Hz, 1H), 2.88 (dt,  $J = 11.0, 5.9$  Hz, 1H);  $^{13}\text{C}$  NMR (75 MHz,  $\text{CDCl}_3$ ):  $\delta = 14.3, 22.9, 26.5, 28.0, 29.5, 29.8, 32.0, 37.2, 50.5, 70.4, 82.2$ ; IR: ( $\text{cm}^{-1}$ )  $\nu$  3311, 2927, 2856, 1456, 1377; HRMS(FAB+) calcd for  $\text{C}_{11}\text{H}_{22}\text{N}$ : 168.1752, found: 168.1755.

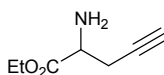

20

Using the representative procedure, a mixture of **10** (32.2 mg, 0.25 mmol), ruthenium catalyst **1** (5.1 mg, 0.005 mmol) and allenylboronic acid pinacol ester (134  $\mu$ L, 0.75 mmol) were reacted at 50 °C under 30W fluorescent light for 6 h to give **20** as pale yellow oil (21.5 mg, 0.153 mmol, 61% yield).  $R_f = 0.51$  ( $\text{CH}_2\text{Cl}_2$ : MeOH = 90:10).

$^1\text{H}$  NMR (300 MHz,  $\text{CDCl}_3$ ):  $\delta = 1.29$  (t,  $J = 7.1$  Hz, 3H), 1.77-1.80 (m, 2H), 2.05 (t,  $J = 2.7$  Hz, 1H), 2.63 (dt,  $J = 4.4, 2.7$  Hz, 2H), 3.62 (t,  $J = 5.7$  Hz, 1H), 4.21 (qd,  $J = 7.1, 2.2$  Hz, 2H);  $^{13}\text{C}$  NMR (75 MHz,  $\text{CDCl}_3$ ):  $\delta = 14.4, 25.1, 53.4, 61.6, 71.5, 79.8, 174.0$ ; IR: ( $\text{cm}^{-1}$ )  $\nu$  3017, 2921, 2851, 1735, 1384, 1261; HRMS(FAB+) calcd for  $\text{C}_7\text{H}_{12}\text{NO}_2$ : 142.0868, found: 142.0868.

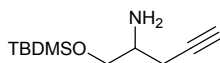

21

Using the representative procedure, a mixture of **11** (50.3 mg, 0.25 mmol), ruthenium catalyst **1** (5.1 mg, 0.005 mmol) and allenylboronic acid pinacol ester (134  $\mu$ L, 0.75 mmol) were reacted at 50 °C under 30W fluorescent light for 12 h to give **21** as pale yellow oil (38.2 mg, 0.179 mmol, 71% yield).  $R_f = 0.42$  ( $\text{CH}_2\text{Cl}_2$ : MeOH = 90:10).

$^1\text{H}$  NMR (300 MHz,  $\text{CDCl}_3$ ):  $\delta = 0.05$  (s, 6H), 0.89 (s, 9H), 1.52 (br s, 2H), 1.99 (t,  $J = 3.0$

Hz, 1H), 2.29 (ddd,  $J = 16.7, 6.1, 2.7$  Hz, 2H), 2.98 (dt,  $J = 12.3, 5.7$  Hz, 1H), 3.56 (dd,  $J = 9.6, 5.1$  Hz, 1H);  $^{13}\text{C}$  NMR (75 MHz,  $\text{CDCl}_3$ ):  $\delta = -5.2, 18.4, 24.1, 26.0, 51.9, 66.9, 70.3, 81.8$ ; IR: ( $\text{cm}^{-1}$ )  $\nu$  3079, 1579, 1516, 1437, 1294, 1234, 1119, 1036, 945; HRMS(FAB+) calcd for  $\text{C}_{11}\text{H}_{24}\text{NOSi}$ : 214.1627, found: 214.1629.

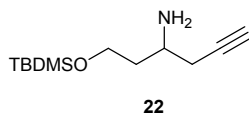

Using the representative procedure, a mixture of **12** (53.8 mg, 0.25 mmol), ruthenium catalyst **1** (5.1 mg, 0.005 mmol) and allenylboronic acid pinacol ester (134  $\mu\text{L}$ , 0.75 mmol) were reacted at 50  $^\circ\text{C}$  under 30W fluorescent light for 12 h to give **22** as pale yellow oil (42.5 mg, 0.187 mmol, 75% yield).  $R_f = 0.49$  ( $\text{CH}_2\text{Cl}_2$ : MeOH = 90:10).

$^1\text{H}$  NMR (300 MHz,  $\text{CDCl}_3$ ):  $\delta = 0.08$  (s, 6H), 0.91 (s, 9H), 1.57 (br s, 2H), 1.59-1.65 (m, 1H), 1.68-1.81 (m, 1H), 2.04 (t,  $J = 2.7$  Hz, 1H), 2.24 (ddd,  $J = 16.5, 6.9, 2.6$  Hz, 1H), 2.39 (ddd,  $J = 16.5, 5.0, 2.6$  Hz, 1H), 3.12 (ddt,  $J = 7.8, 6.9, 4.8$  Hz, 1H), 3.68-3.85 (m, 2H);  $^{13}\text{C}$  NMR (75 MHz,  $\text{CDCl}_3$ ):  $\delta = -5.1, 18.5, 26.1, 28.3, 39.6, 48.3, 61.1, 70.4, 82.1$ ; IR: ( $\text{cm}^{-1}$ )  $\nu$  3312, 2930, 2858, 1629, 1473, 1386, 1362, 1256, 1091; HRMS(FAB+) calcd for  $\text{C}_{12}\text{H}_{26}\text{NOSi}$ : 228.1784, found: 228.1784.

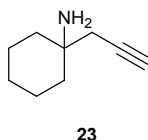

Using the representative procedure, a mixture of **13** (31.3 mg, 0.25 mmol), ruthenium catalyst **1** (7.6 mg, 0.0075 mmol) and allenylboronic acid pinacol ester (134  $\mu\text{L}$ , 0.75 mmol) were reacted at 50  $^\circ\text{C}$  under 30W fluorescent light for 24 h to give **23** as yellow oil (24.8 mg, 0.181 mmol, 72% yield).  $R_f = 0.45$  ( $\text{CH}_2\text{Cl}_2$ : MeOH = 90:10).

$^1\text{H}$  NMR (300 MHz,  $\text{CDCl}_3$ ):  $\delta = 1.25$ -1.60 (m, 12H), 2.03 (t,  $J = 2.7$  Hz, 1H), 2.26 (d,  $J = 2.7$  Hz, 2H);  $^{13}\text{C}$  NMR (75 MHz,  $\text{CDCl}_3$ ):  $\delta = 22.5, 26.0, 33.3, 38.1, 50.7, 71.1, 81.6$ ; IR: ( $\text{cm}^{-1}$ )  $\nu$  3017, 2925, 1384, 1262; HRMS(FAB+) calcd for  $\text{C}_9\text{H}_{16}\text{N}$ : 138.1283, found: 138.1284.

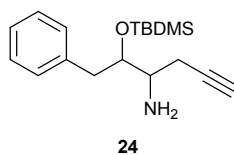

Using the representative procedure, a mixture of **14** (72.9 mg, 0.25 mmol), ruthenium catalyst **1** (7.6 mg, 0.0075 mmol) and allenylboronic acid pinacol ester (134  $\mu$ L, 0.75 mmol) were reacted at 50  $^{\circ}$ C under 30W fluorescent light for 12 h to give **24** as pale yellow oil (64.6 mg, 0.212 mmol, 85% yield).  $R_f$  = 0.82 ( $\text{CH}_2\text{Cl}_2$ : MeOH = 90:10).

$^1\text{H}$  NMR (300 MHz,  $\text{CDCl}_3$ ):  $\delta$  = -0.30 (s, 0.6H), -0.09 (s, 2.4H), -0.02 (s, 0.6H), 0.06 (s, 2.4H), 0.85 (s, 1.8H), 0.89 (s, 7.2H), 1.39-1.46 (m, 2H), 1.98 (t,  $J$  = 2.6 Hz, 0.8H), 2.03 (t,  $J$  = 2.7 Hz, 0.2H), 2.19-2.46 (m, 2H), 2.71-2.78 (m, 2H), 2.92-3.00 (m, 1H), 3.92-3.99 (m, 1H), 7.18-7.29 (m, 5H);  $^{13}\text{C}$  NMR (75 MHz,  $\text{CDCl}_3$ ):  $\delta$  = -4.8, -4.5, -4.5, -4.4, 18.2, 18.3, 24.8, 25.1, 25.5, 26.1, 26.1, 38.9, 40.6, 52.8, 54.3, 70.2, 70.5, 75.4, 76.4, 82.3, 82.7, 126.5, 126.5, 128.5, 128.6, 129.7, 130.0, 138.6, 138.8; IR: ( $\text{cm}^{-1}$ )  $\nu$  3311, 2955, 2929, 2857, 1252, 1084, 810, 777; HRMS(FAB $^+$ ) calcd for  $\text{C}_{18}\text{H}_{30}\text{NOSi}$ : 304.2097, found: 304.2099.

### III. Representative Procedure for the Preparation of Azides

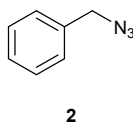

A solution of benzyl bromide (2.0 g, 11.7 mmol) and sodium azide (2.28 g, 35.1 mmol) in DMF (58.5 mL, 0.2 M) was stirred at 70  $^{\circ}$ C for 11 h. The reaction mixture was quenched with water (30 mL). The solution was extracted with EtOAc (5 x 30 mL). The organic layers were combined and washed with brine (3 x 20 mL), dried over  $\text{Na}_2\text{SO}_4$ , filtered, and concentrated under reduced pressure. The residue oil was purified by flash column chromatography on deactivated silica gel eluting with hexane: ether = 90:10 (1.48 g, 11.1 mmol, 95% yield).  $R_f$  = 0.68 (hexane: EtOAc = 90:10). The spectral data are in complete agreement with the literature data.<sup>3</sup>

$^1\text{H}$  NMR (300 MHz,  $\text{CDCl}_3$ ):  $\delta$  = 4.39 (s, 2H), 7.38-7.52 (m, 5H);  $^{13}\text{C}$  NMR (75 MHz,  $\text{CDCl}_3$ ):  $\delta$  = 54.4, 128.0, 128.0, 128.6, 135.3;

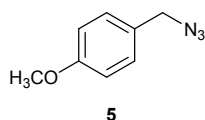

Yield: 86 % yield.  $R_f = 0.33$  (Hexane: Ether = 95:5); The spectral data are in complete agreement with the literature data.<sup>4</sup>

$^1\text{H NMR}$  (300 MHz,  $\text{CDCl}_3$ ):  $\delta = 3.84$  (s, 3H), 4.29 (s, 2H), 6.92-6.96 (m, 2H), 7.25-7.30 (m, 2H);  $^{13}\text{C NMR}$  (75 MHz,  $\text{CDCl}_3$ ):  $\delta = 54.6, 55.5, 114.4, 127.6, 129.9, 159.8$ .

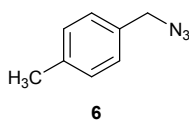

Yield: 67 %.  $R_f = 0.61$  (Hexane: Ether = 90: 10); The spectral data are in complete agreement with the literature data.<sup>5</sup>

$^1\text{H NMR}$  (300 MHz,  $\text{CDCl}_3$ ):  $\delta = 2.37$  (s, 3H), 4.29 (s, 2H), 7.14-7.25 (m, 4H);  $^{13}\text{C NMR}$  (75 MHz,  $\text{CDCl}_3$ ):  $\delta = 21.4, 54.8, 128.5, 129.7, 132.5, 138.4$ .

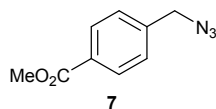

Yield: 89 %.  $R_f = 0.23$  (Hexane: Ether = 90: 10); The spectral data are in complete agreement with the literature data.<sup>6</sup>

$^1\text{H NMR}$  (300 MHz,  $\text{CDCl}_3$ ):  $\delta = 3.92$  (s, 3H), 4.41 (s, 2H), 7.39 (d,  $J = 8.1$  Hz, 2H), 8.05 (d,  $J = 6.6, 1.5$  Hz, 2H);  $^{13}\text{C NMR}$  (75 MHz,  $\text{CDCl}_3$ ):  $\delta = 52.4, 54.5, 128.1, 130.2, 130.3, 140.6, 166.8$ .

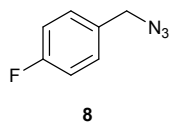

Yield: 91 % yield.  $R_f = 0.47$  (Hexane: Ether= 95:5); The spectral data are in complete agreement with the literature data.<sup>4</sup>

$^1\text{H NMR}$  (300 MHz,  $\text{CDCl}_3$ ):  $\delta = 4.32$  (s, 2H), 7.05-7.11 (m, 2H), 7.28-7.32 (m, 2H);  $^{13}\text{C NMR}$  (75 MHz,  $\text{CDCl}_3$ ):  $\delta = 54.3, 116.0$  (d,  $J = 21.4$  Hz), 130.2 (d,  $J = 8.2$  Hz), 131.4 (d,  $J = 3.2$  Hz), 162.9 (d,  $J = 245.5$  Hz).



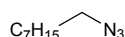

9

Yield: 77 % yield.  $R_f = 0.83$  (Hexane: EtOAc = 90: 10); The spectral data are in complete agreement with the literature data.<sup>3</sup>

$^1\text{H NMR}$  (300 MHz,  $\text{CDCl}_3$ ):  $\delta = 0.88$  (t,  $J = 6.8$  Hz, 3H), 1.22-1.41 (m, 10H), 1.52-1.68 (m, 2H), 3.25 (t,  $J = 7.1$  Hz, 2H);  $^{13}\text{C NMR}$  (75 MHz,  $\text{CDCl}_3$ ):  $\delta = 14.3, 22.8, 26.9, 29.0, 29.3, 29.4, 32.0, 51.7$ .

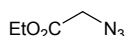

10

Yield: 84 % yield.  $R_f = 0.48$  (Hexane: EtOAc = 90: 10); The spectral data are in complete agreement with the literature data.<sup>6</sup>

$^1\text{H NMR}$  (300 MHz,  $\text{CDCl}_3$ ):  $\delta = 1.34$  (t,  $J = 7.1$  Hz, 3H), 3.89 (s, 2H), 4.29 (q,  $J = 7.2$  Hz, 2H);  $^{13}\text{C NMR}$  (75 MHz,  $\text{CDCl}_3$ ):  $\delta = 14.3, 50.5, 62.0, 168.5$ .

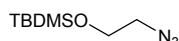

11

Yield: 72.6 %.  $R_f = 0.65$  (Hexane: EtOAc = 95:5); The spectral data are in complete agreement with the literature data.<sup>7</sup>

$^1\text{H NMR}$  (300 MHz,  $\text{CDCl}_3$ ):  $\delta = 0.09$  (s, 6H), 0.91 (s, 9H), 3.26 (t,  $J = 5.1$  Hz, 2H), 3.80 (t,  $J = 5.1$  Hz, 2H);  $^{13}\text{C NMR}$  (75 MHz,  $\text{CDCl}_3$ ):  $\delta = -5.2, 18.4, 26.0, 53.4, 62.8$ .

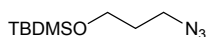

12

Yield: 57.4 %.  $R_f = 0.65$  (Hexane: EtOAc = 95:5); The spectral data are in complete agreement with the literature data.<sup>8</sup>

$^1\text{H NMR}$  (300 MHz,  $\text{CDCl}_3$ ):  $\delta = 0.09$  (s, 6H), 0.89 (s, 9H), 1.77 (dt,  $J = 6.6, 6.0$  Hz, 2H), 3.39 (t,  $J = 6.6$  Hz, 2H), 3.69 (t,  $J = 6.0$  Hz, 2H);  $^{13}\text{C NMR}$  (75 MHz,  $\text{CDCl}_3$ ):  $\delta = -5.2, 18.5, 26.1, 32.0, 48.4, 59.8$ .

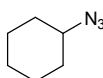

13

Yield = 73%.  $R_f$  = 0.81 (hexane: EtOAc = 90: 10). The spectral data are in complete agreement with the literature data.<sup>6</sup>

$^1\text{H}$  NMR (300 MHz,  $\text{CDCl}_3$ ):  $\delta$  = 1.06-1.40 (m, 5H), 1.42-1.58 (m, 1H), 1.61-1.74 (m, 2H), 1.75-1.97 (m, 2H), 3.20-3.41 (m, 1H);  $^{13}\text{C}$  NMR (75 MHz,  $\text{CDCl}_3$ ):  $\delta$  = 24.2, 25.3, 31.6, 59.9.

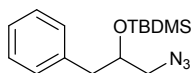

14

Yield: 64%.  $R_f$  = 0.76 (hexane: EtOAc = 80: 20). The spectral data are in complete agreement with the literature data.<sup>9</sup>

$^1\text{H}$  NMR (300 MHz,  $\text{CDCl}_3$ ):  $\delta$  = -0.10 (s, 3H), -0.05 (s, 3H), 0.89 (s, 9H), 2.79 (dd,  $J$  = 13.7, 6.8 Hz, 1H), 2.85 (dd,  $J$  = 13.7, 6.8 Hz, 1H), 3.08 (dd,  $J$  = 12.5, 5.3 Hz, 1H), 3.25 (dd,  $J$  = 12.5, 4.1 Hz, 1H), 3.98 (tdd,  $J$  = 6.6, 5.3, 4.1 Hz, 1H), 7.12-7.24 (m, 3H), 7.26-7.37 (m, 2H);  $^{13}\text{C}$  NMR (75 MHz,  $\text{CDCl}_3$ ):  $\delta$  = -4.9, -4.7, 18.2, 26.0, 41.8, 56.1, 73.4, 126.7, 128.6, 129.9, 138.0.

#### IV. Assignment of the stereochemistry of 24

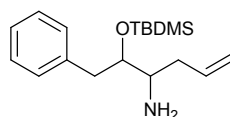

S - 24

To a solution of **24** (10 mg, 0.033 mmol) and quinoline (1 drop in 7 mL of MeOH) in MeOH (0.16 mL) was added Lindlar's catalyst (2 mg, 20 wt%) at room temperature. Then the atmosphere was changed slowly to  $\text{H}_2$  gas and was stirred for 1 hour. After the complete conversion, the reaction mixture was filtered over celite and concentrated under reduced pressure. **S-24** was obtained in 81% NMR yield with 79: 21 diastereoselectivity. Syn-product was determined as a major diastereomer by comparison  $^1\text{H}$ -NMR spectra to the literature data.<sup>6</sup>

$^1\text{H}$  NMR (300 MHz,  $\text{CDCl}_3$ ):  $\delta$  = -0.14 (s, 3H), 0.03 (s, 3H), 0.94 (s, 9H), 1.24-1.38 (m, 2H), 2.04-2.08 (m, 2H), 2.22-2.37 (m, 1H), 2.54-2.66 (m, 1H), 2.67-2.78 (m, 1H), 2.97 (dd,  $J$  = 13.4, 7.1 Hz, 1H), 3.74-3.89 (m, 1H), 5.00-5.16 (m, 2H), 5.64-5.88 (m, 1H), 7.19-7.30 (m, 3H), 7.31-7.42 (m, 2H).

## V. Synthesis of 2,6-dialkyl-4-hydroxy-piperidine 26

### Preparation of substrate 25

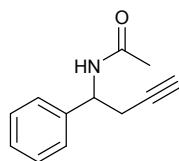

25

To **3** (232 mg, 1.60 mmol) and triethylamine (0.54 mL, 3.20 mmol) in CH<sub>2</sub>Cl<sub>2</sub> (8.0 mL, 0.2 M) was added acetyl chloride (0.14 mL, 1.92 mmol) at room temperature. The reaction mixture was stirred at room temperature for 5 h. The reaction was quenched with water (10 mL). The solution was extracted with CH<sub>2</sub>Cl<sub>2</sub> (3 x 5 mL). The organic layers were combined, washed with saturated NaHCO<sub>3</sub> (10 mL), dried over anhydrous Na<sub>2</sub>SO<sub>4</sub> and concentrated under reduced pressure. The residue oil was purified by flash column chromatography on silica gel eluting with hexane: EtOAc = 93: 7 to give the substrate **25** as a white powder (200 mg, 1.07 mmol, 67% yield). R<sub>f</sub> = 0.15 (hexane: EtOAc = 50:50). The spectral data are in complete agreement with the literature data.<sup>10</sup>

<sup>1</sup>H NMR (300 MHz, CDCl<sub>3</sub>): δ = 2.02 (t, *J* = 2.4 Hz, 1H), 2.05 (s, 3H), 2.77 (m, 2H), 5.23 (m, 1H), 6.01 (br s, 1H), 7.26-7.40 (m, 5H); <sup>13</sup>C NMR (75 MHz, CDCl<sub>3</sub>): δ = 23.6, 25.7, 51.1, 71.7, 80.2, 126.8, 128.0, 128.9, 140.5, 169.6.

### Gold(I)-catalyzed cycloisomerization-reduction of substrate 25

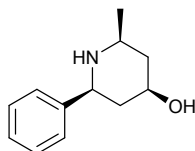

26

To **25** (37.4 mg, 0.2 mmol) and 4 Å MS (200 mg) was added a solution of MsOH (15.6 μL, 0.24 mmol) and [Au(PPh<sub>3</sub>)]<sup>+</sup>NTf<sub>2</sub><sup>-</sup> (7.4 mg, 0.01 mmol) in CH<sub>2</sub>Cl<sub>2</sub> (4.0 mL). The reaction mixture was stirred at room temperature for 20 min and cooled to -78 °C. Catecholborane (1.2 mL, 1.2 mmol) was added dropwise to the reaction mixture. The reaction mixture was slowly warmed to room temperature and stirred for 10 h. The reaction was quenched with MeOH (2 mL) and stirred for 15 min. Saturated sodium tartarate solution (5 mL) was added and then the solution was stirred for 15 min. Brine (40 mL) and saturated NaOH (20 mL) was added. The solution was extracted with CH<sub>2</sub>Cl<sub>2</sub> (4 x 20 mL). The organic layers were

combined, dried over anhydrous Na<sub>2</sub>SO<sub>4</sub> and concentrated under reduced pressure. The residue oil was purified by preparative TLC eluting with hexane: EtOAc = 20: 80 to give **26** as a white solid (21.8 mg, 0.114 mmol, 57% yield). R<sub>f</sub> = 0.11 (hexane: EtOAc = 20: 80). The spectral data are in complete agreement with the literature data.<sup>10</sup>

<sup>1</sup>H NMR (300 MHz, CDCl<sub>3</sub>): δ = 1.16 (q, *J* = 11.4 Hz, 1H), 1.17 (d, *J* = 6.3 Hz, 3H), 1.45 (q, *J* = 11.4 Hz, 1H), 1.62 (bs, 2H), 2.01 (m, 1H), 2.11 (m, 1H), 2.86 (m, 1H), 3.69 (dd, *J* = 2.4, 11.4 Hz, 1H), 3.81 (m, 1H), 7.21 – 7.42 (m, 5H); <sup>13</sup>C NMR (75 MHz, CDCl<sub>3</sub>): δ = 22.5, 43.4, 43.4, 50.7, 59.7, 69.7, 126.7, 127.3, 128.5, 143.9.

## VI. References:

1. C. P. Casey, T. E. Vos, S. W. Singer, I. A. Guzei, *Organometallics*, 2002, **21**, 5038.
2. J.-E. Kang, H.-B. Kim, J.-W. Lee, S. Shin, *Org. Lett.*, 2006, **8**, 3537.
3. C. Pardin, I. Roy, W. D. Lubell, J. W. Keilor, *Chem. Biol. Drug Des.*, 2008, **72**, 189.
4. A. Chakraborty, S. Dey, S. Sawoo, N. N. Adarsh, A. Sarkar, *Organometallics*, 2010, **29**, 6619.
5. R. M. Pinto, R. I. Olariu, J. Lameiras, F. T. Martins, A. A. Dias, G. J. Langley, P. Rodrigues, C. D. Maycock, J. P. Santos, M. F. Duarte, M. T. Fernandez, M. L. Costa, *J. Mol. Struct.*, 2010, **980**, 163.
6. J. H. Lee, S. Gupta, W. Jeong, Y. H. Rhee, J. Park, *Angew. Chem., Int. Ed.* 2012, **51**, 10851.
7. H. S. Jr. Richard, F. M. Andrew, L. S. Jr. Donald, N. C. Gwendolyn, J. M. Christopher, *J. Org. Chem. Soc.*, 1988, **53**, 1467.
8. A. B. Ryan, W. Morgan, T. L. Jason, S. P. James, *Org. Lett.*, 2010, **12**, 336.
9. R. T. Sawant, S. B. Waghmode, *Tetrahedron*, 2010, **66**, 2010.
10. L. Cui, C. Li, L. Zhang, *Angew. Chem., Int. Ed.*, 2010, **49**, 9178.

## VII. <sup>1</sup>H- and <sup>13</sup>C-NMR spectra:

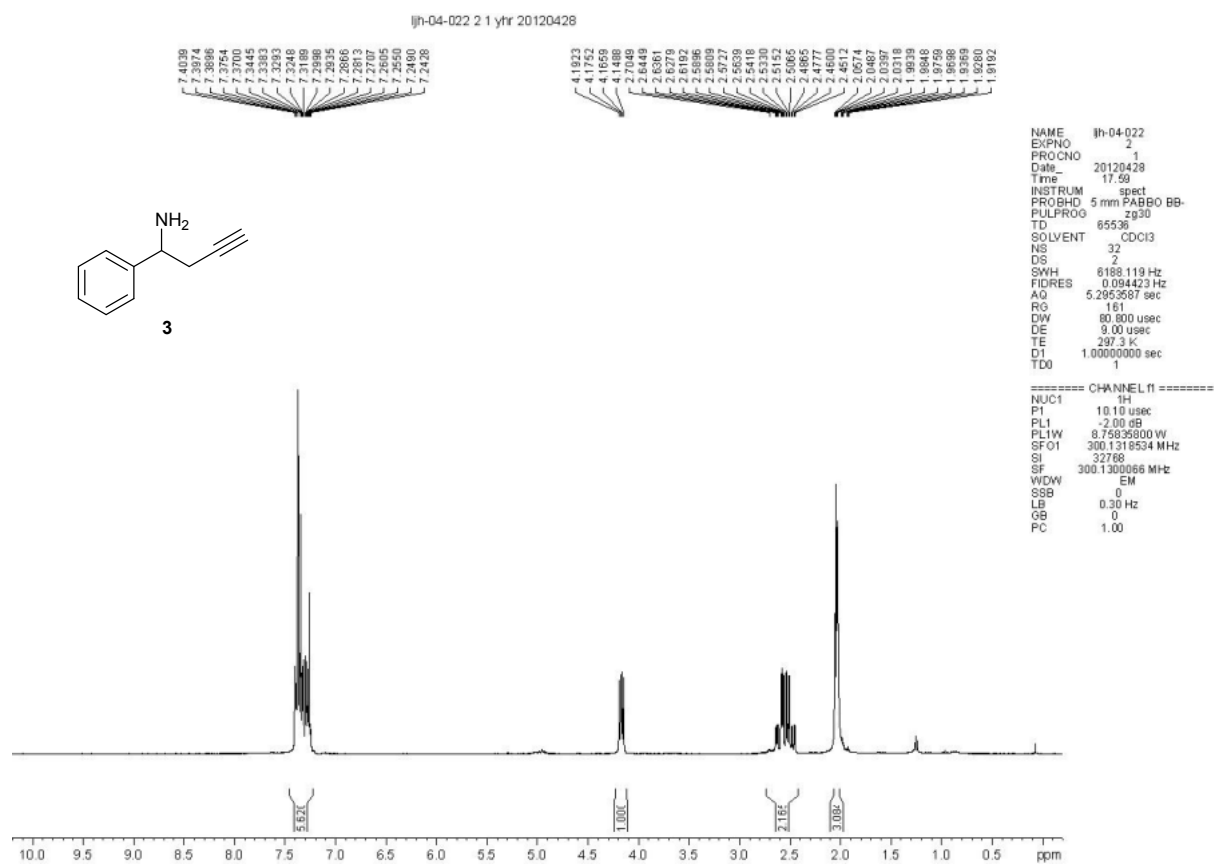

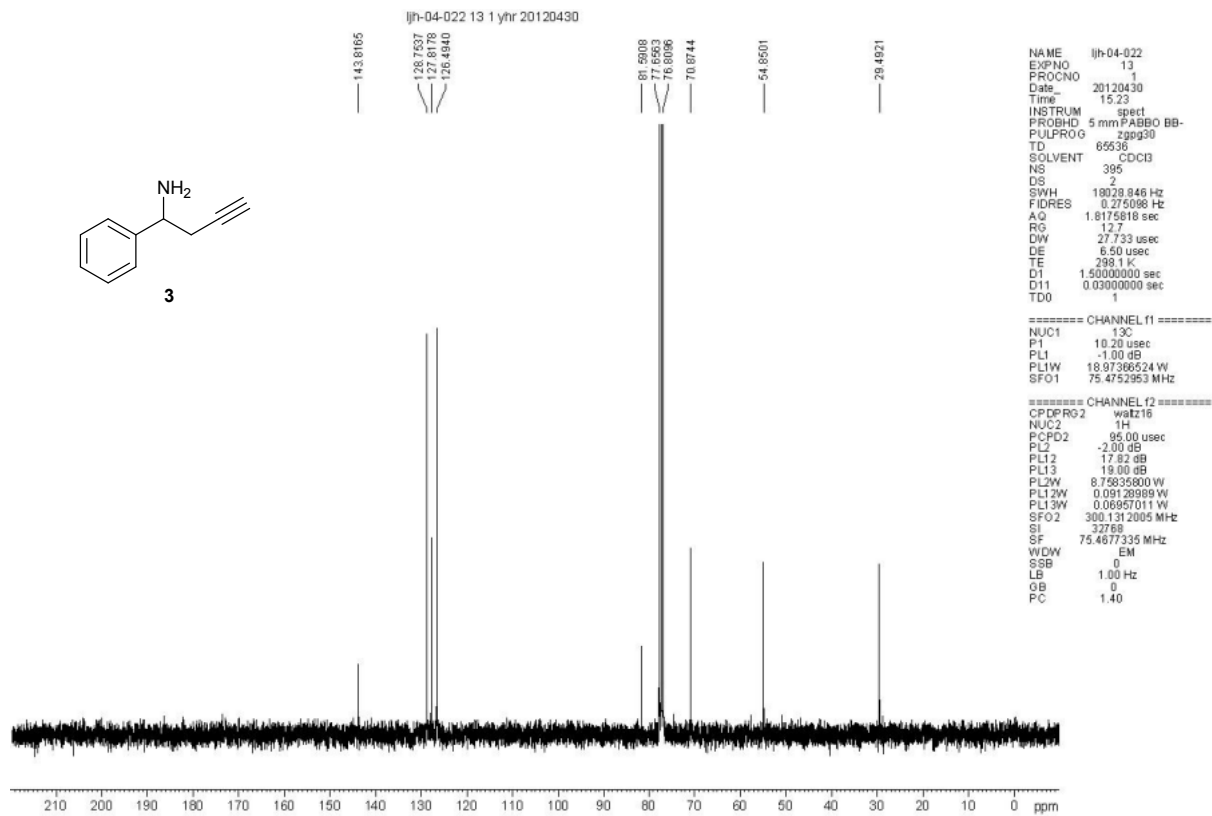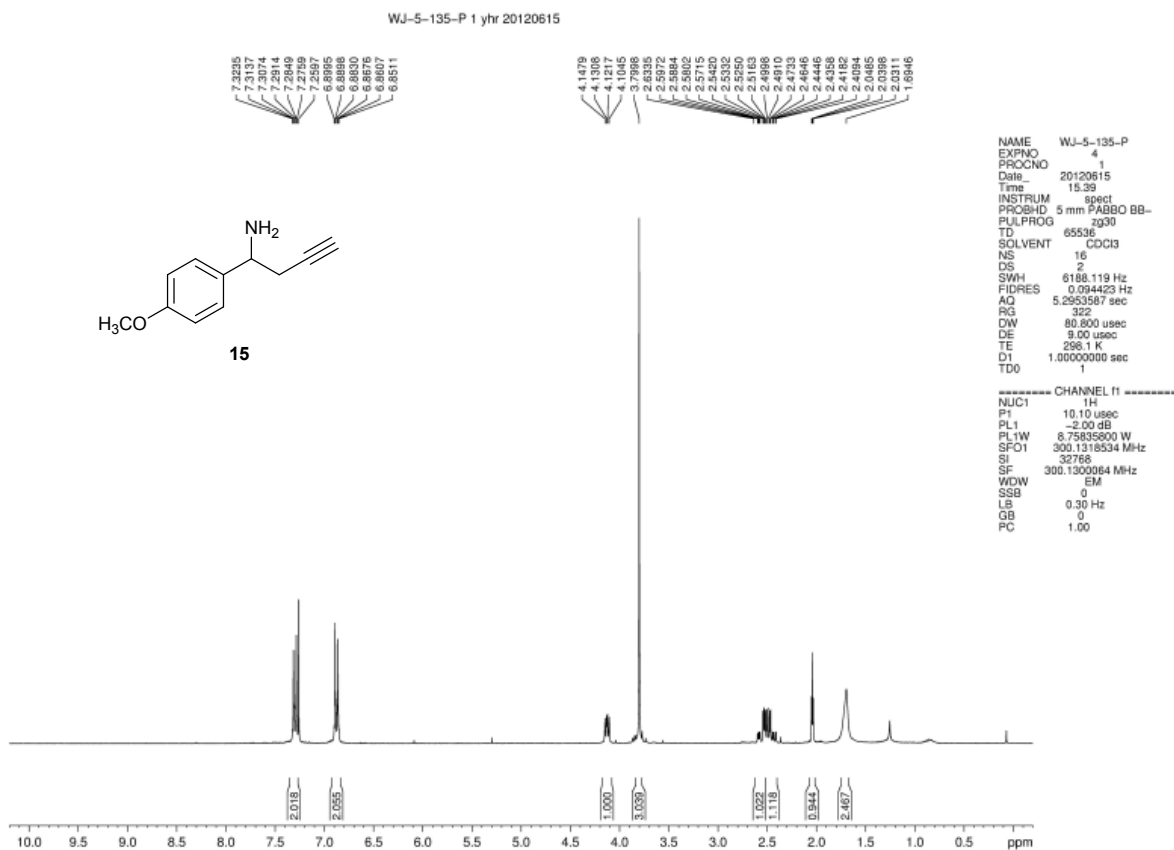

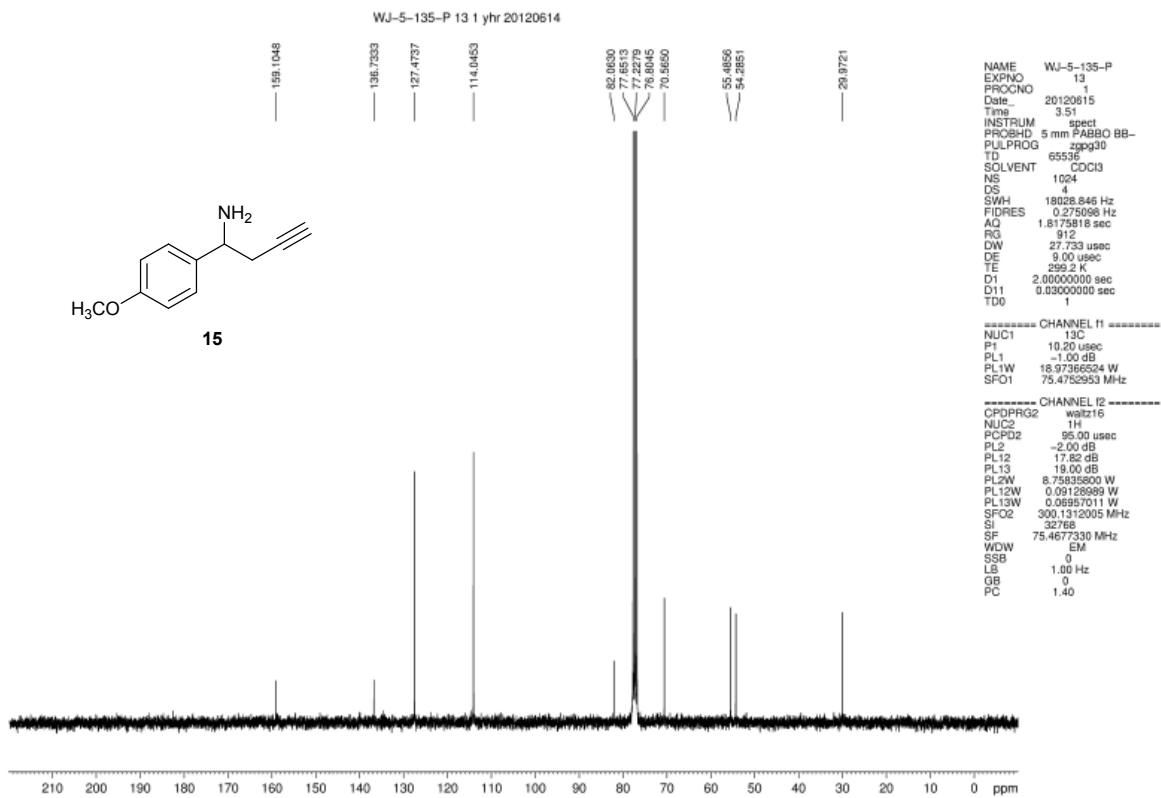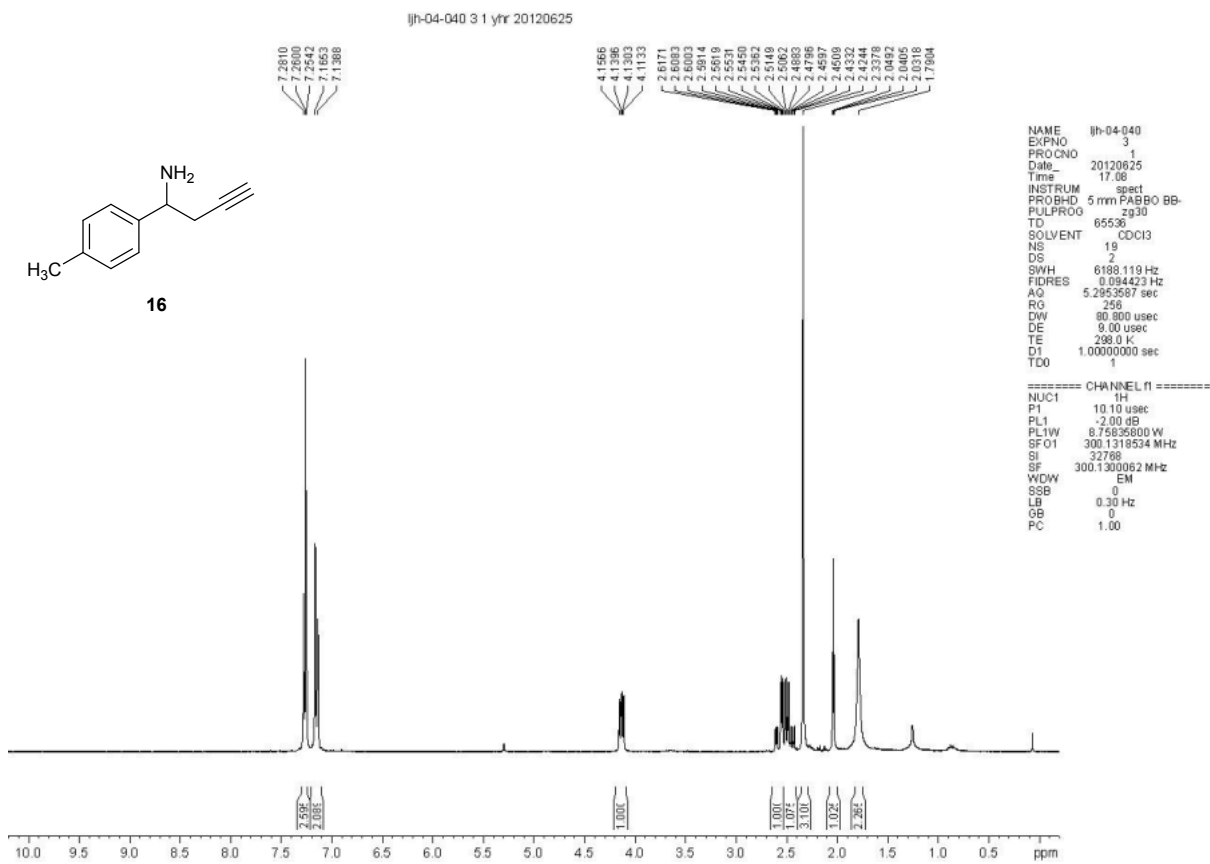

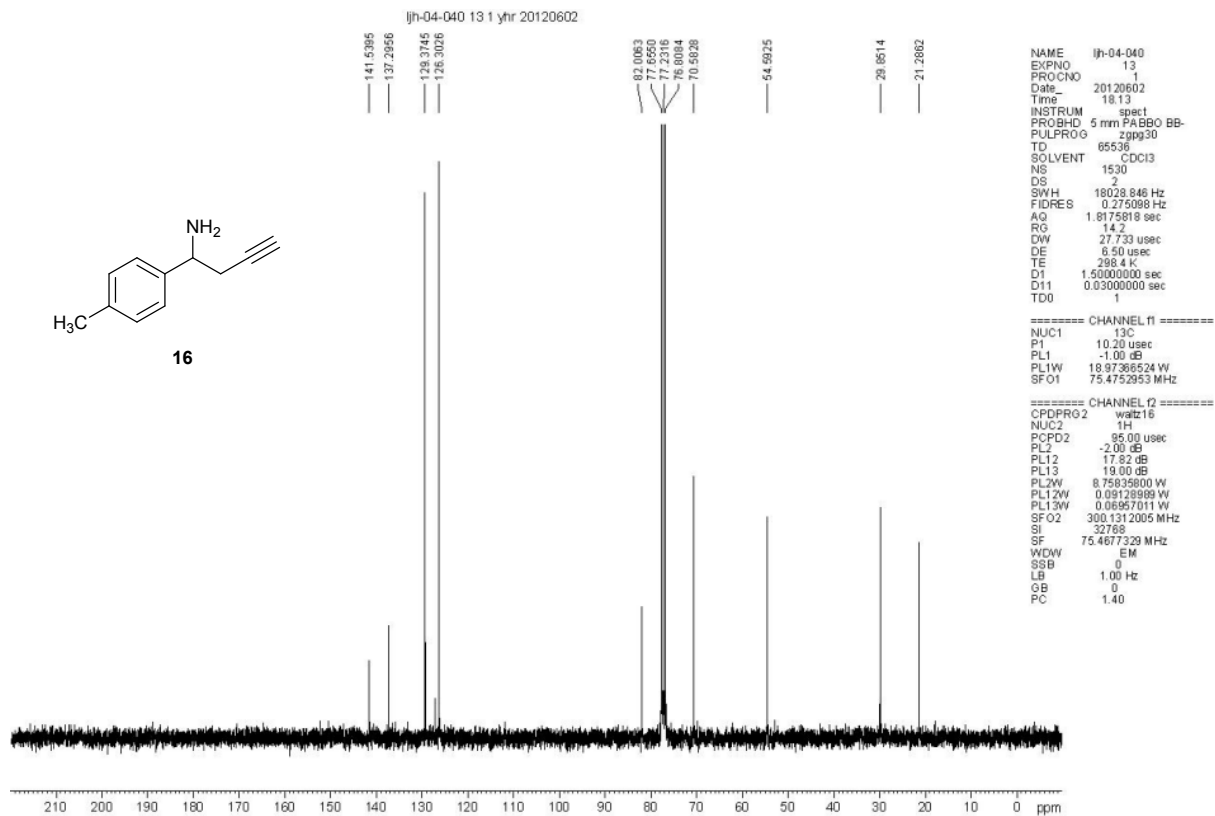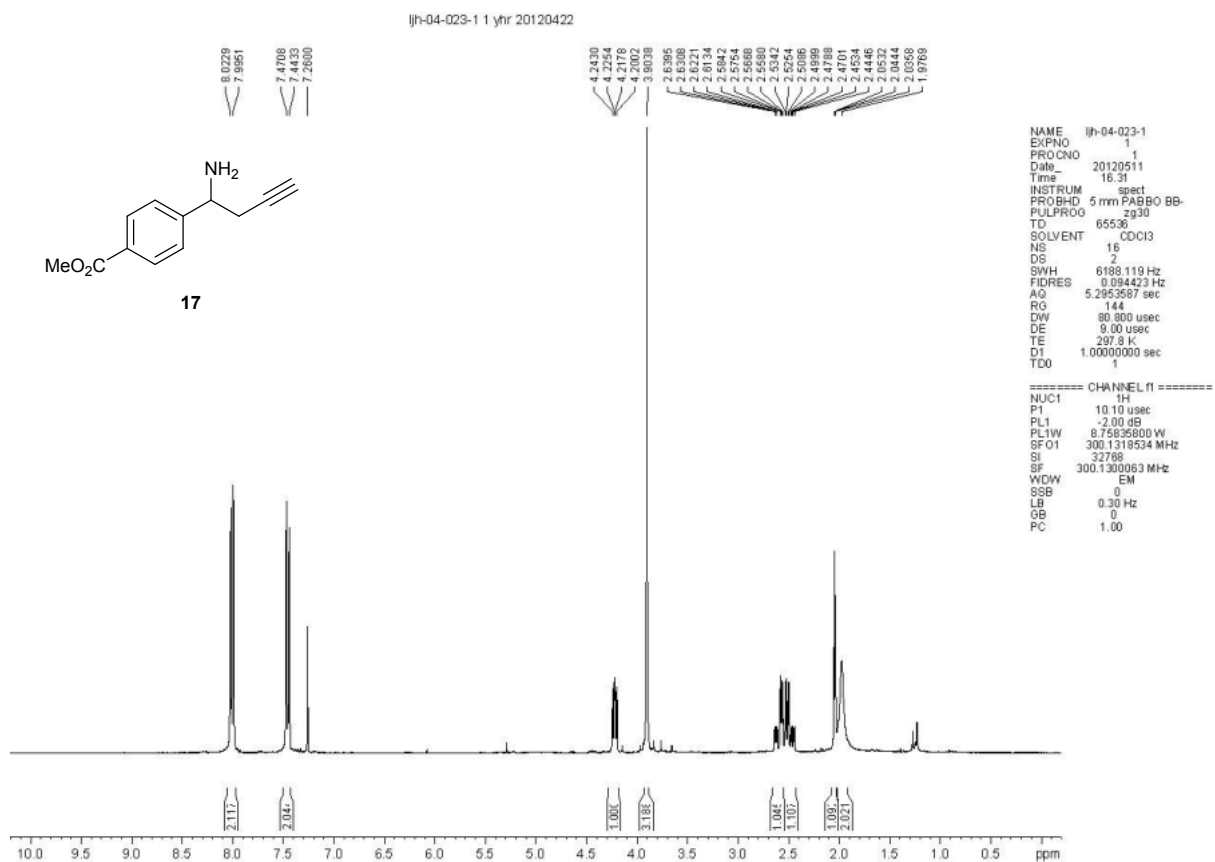



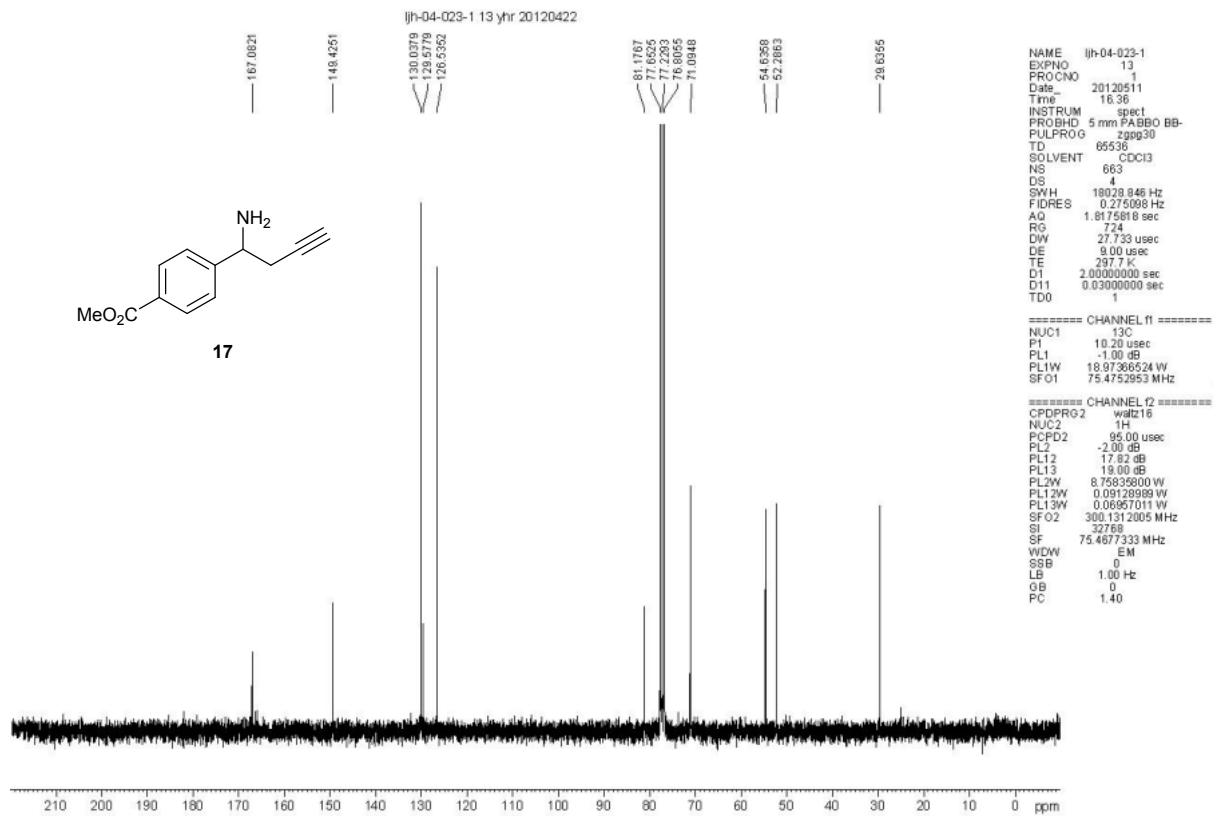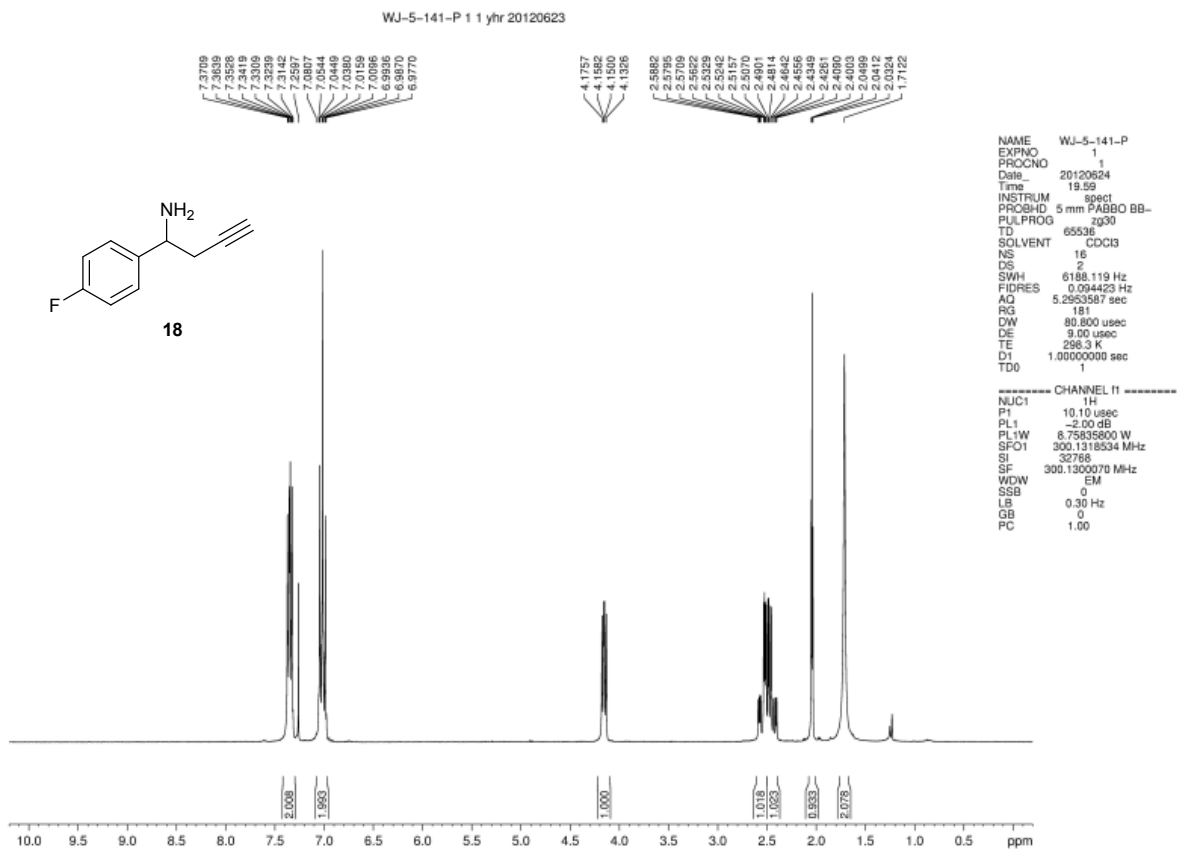

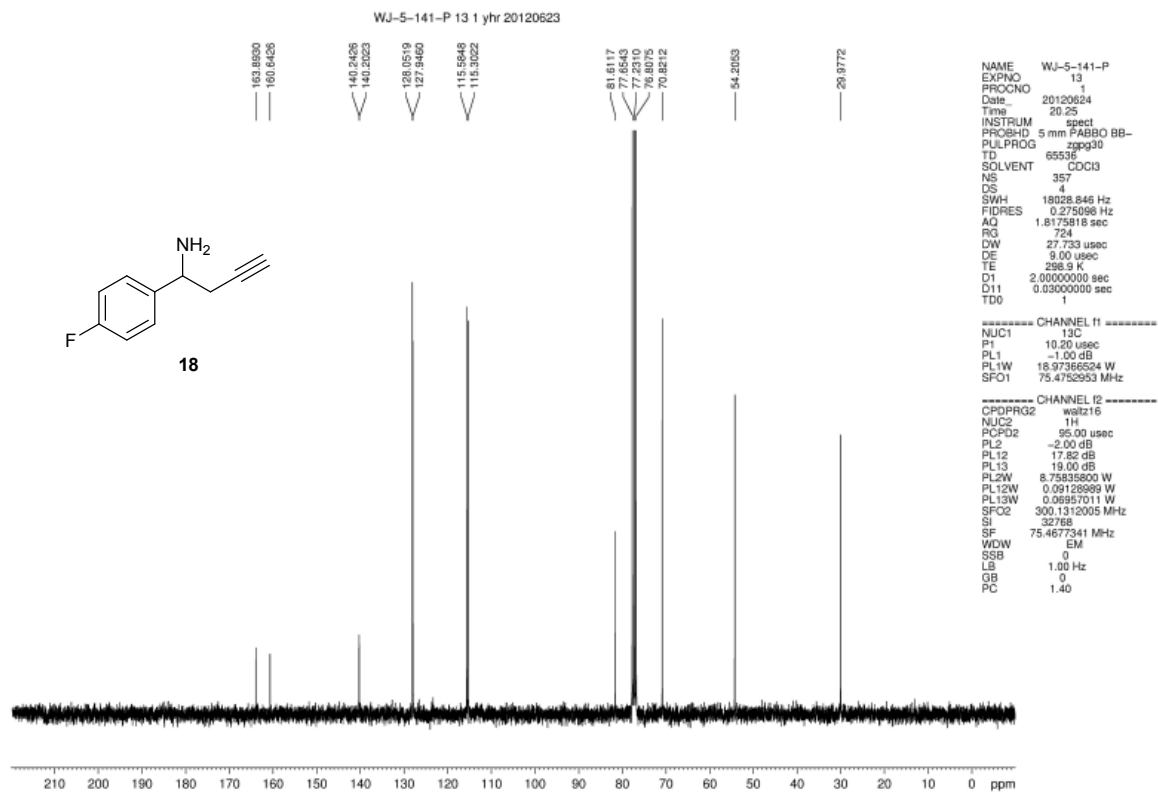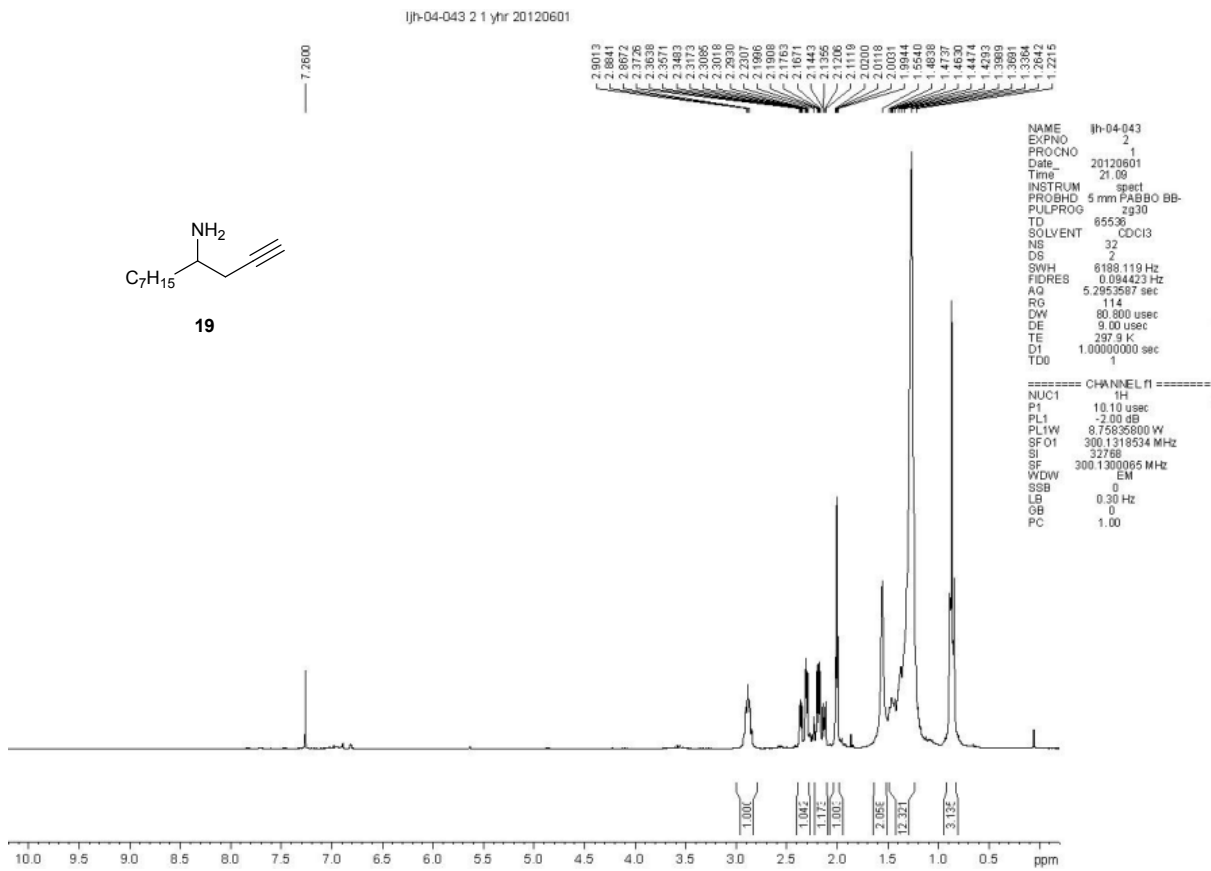

ljh-04-043 13 1 yhr 20120601

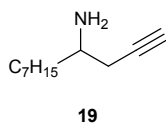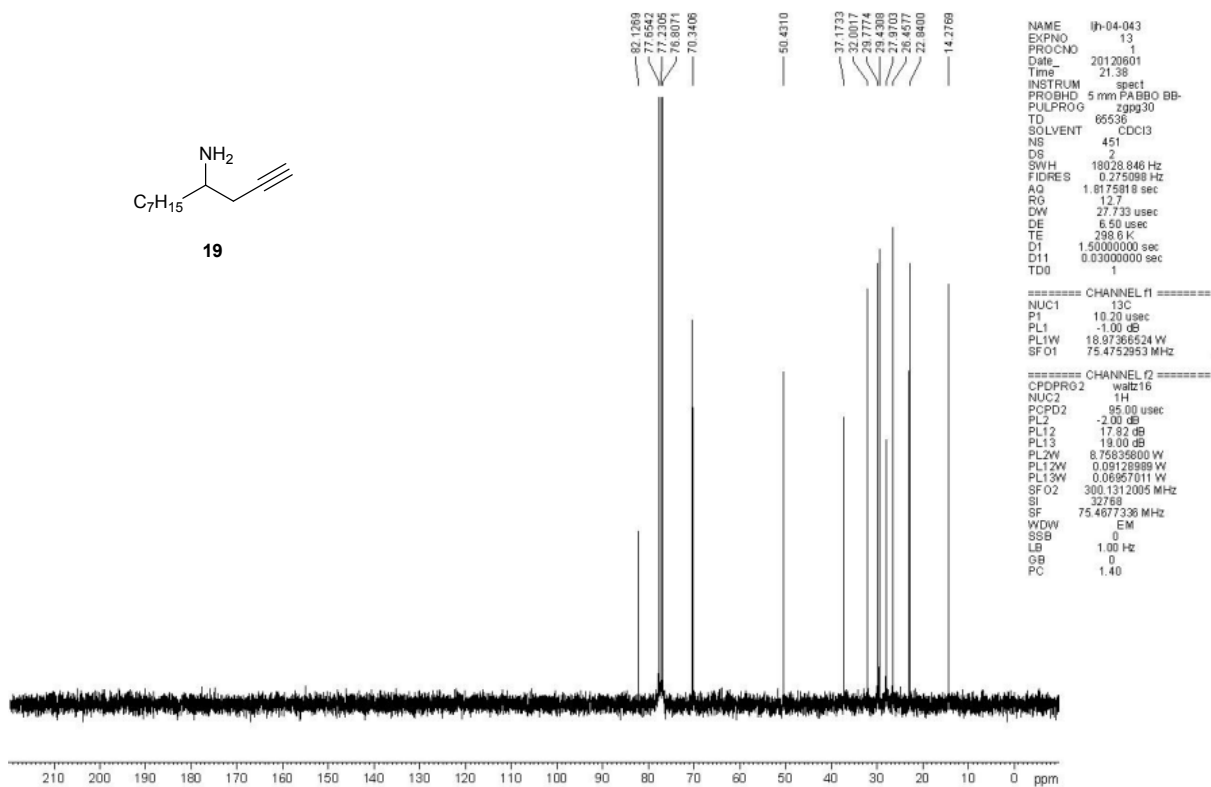

```

NAME ljh-04-043
EXPNO 13
PROCNO 20120601
Date_ 21.38
Time 21.38
INSTRUM spect
PROBHD 5 mm PABBO BB-
PULPROG zgpg30
TD 65536
SOLVENT CDCl3
NS 451
DS 2
SWH 18028.846 Hz
FIDRES 0.275098 Hz
AQ 1.6175818 sec
RG 12.7
DW 27.733 usec
DE 6.50 usec
TE 298.6 K
D1 1.5000000 sec
D11 0.0300000 sec
TDO 1

===== CHANNEL f1 =====
NUC1 13C
P1 10.20 usec
PL1 -1.00 dB
PL1W 18.97366524 W
SF01 75.4752953 MHz

===== CHANNEL f2 =====
CPDPRG2 waltz16
NUC2 1H
PCPD2 95.00 usec
PL2 -2.00 dB
PL2 17.82 dB
PL3 18.00 dB
PL2W 8.75835800 W
PL12W 0.09128989 W
PL13W 0.06857011 W
SF02 300.1312005 MHz
SI 32768
SF 75.4677336 MHz
WDW EM
SSB 0
LB 1.00 Hz
GB 0
PC 1.40
    
```

ljh-04-033 3 1 yhr 20120519

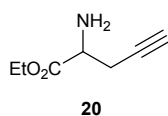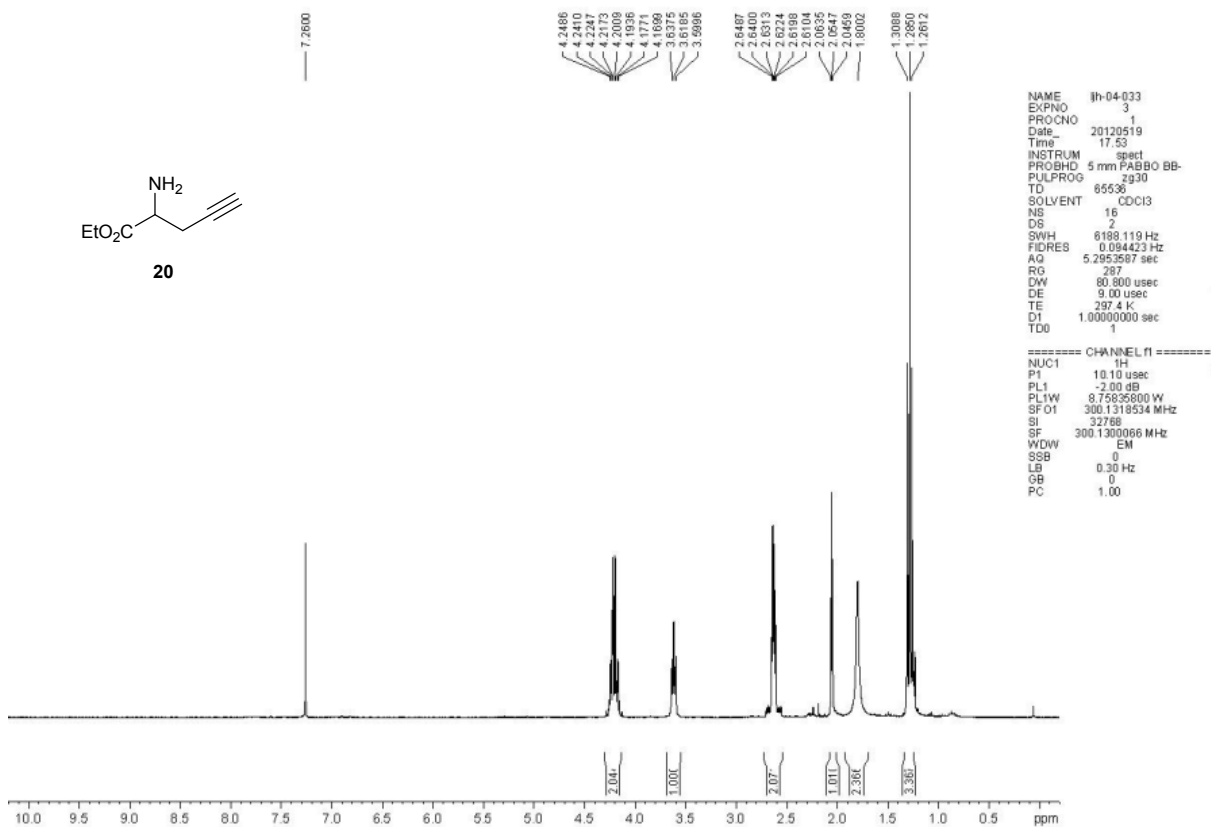

```

NAME ljh-04-033
EXPNO 3
PROCNO 20120519
Date_ 17.53
Time 17.53
INSTRUM spect
PROBHD 5 mm PABBO BB-
PULPROG zg30
TD 65536
SOLVENT CDCl3
NS 16
DS 2
SWH 6193.119 Hz
FIDRES 0.094423 Hz
AQ 5.2953587 sec
RG 267
DW 80.800 usec
DE 9.00 usec
TE 297.4 K
D1 1.0000000 sec
TDO 1

===== CHANNEL f1 =====
NUC1 1H
P1 10.10 usec
PL1 -2.00 dB
PL1W 8.75835800 W
SF01 300.1319534 MHz
SI 32768
SF 300.1300066 MHz
WDW EM
SSB 0
LB 0.30 Hz
GB 0
PC 1.00
    
```

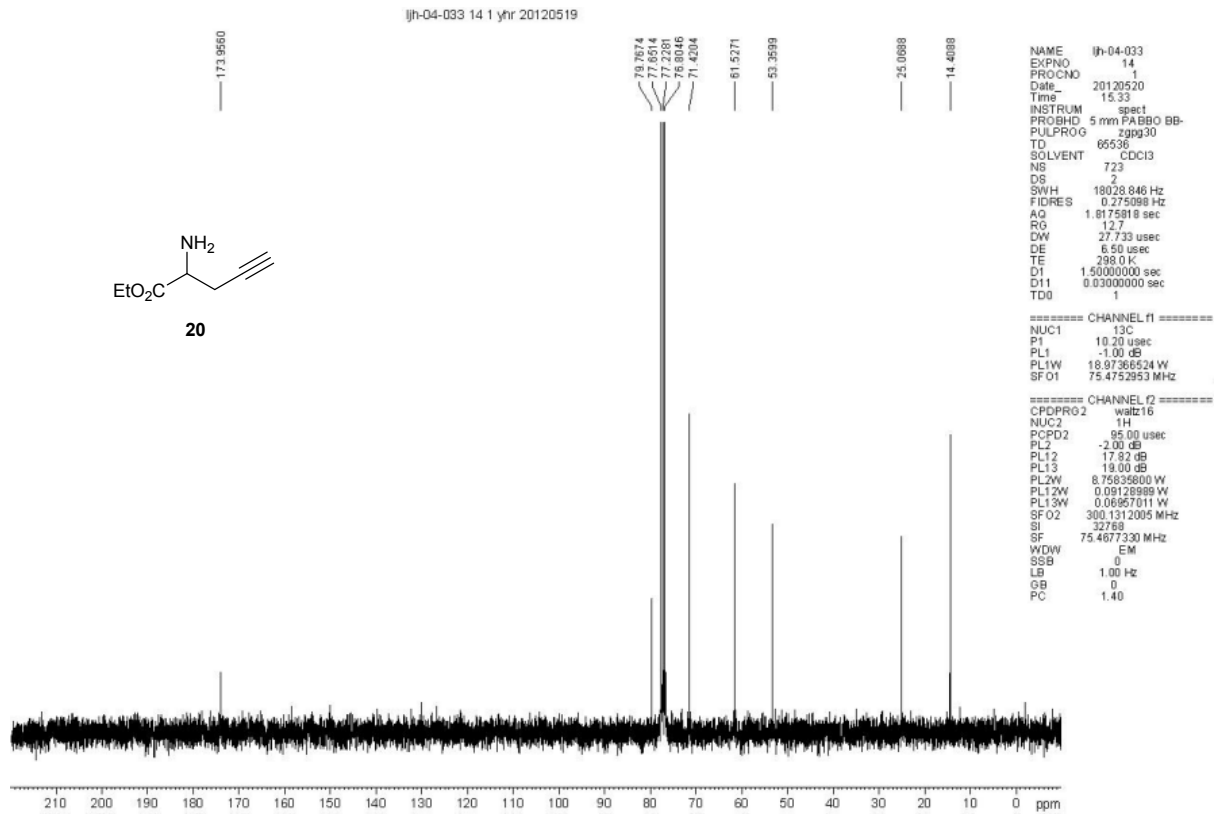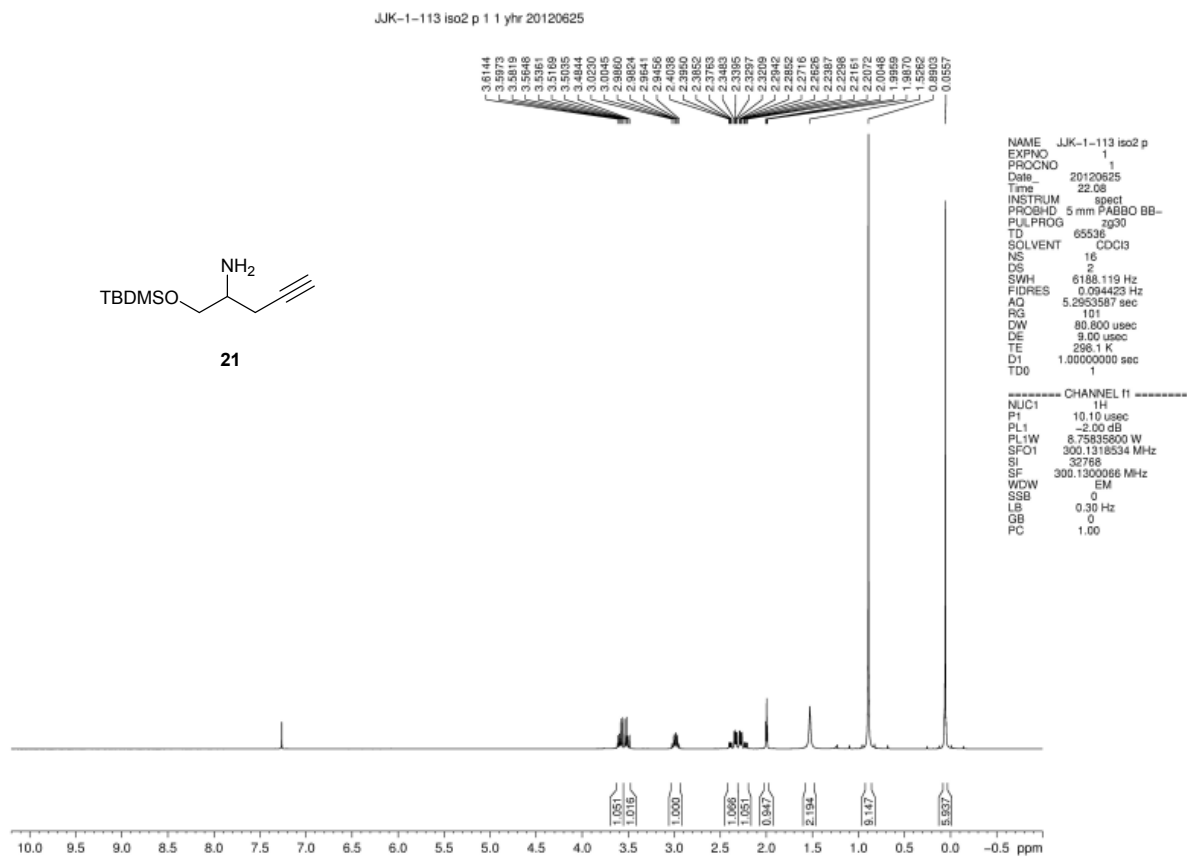

JJK-1-113 iso2 p-1 13 1 yhr 20120625

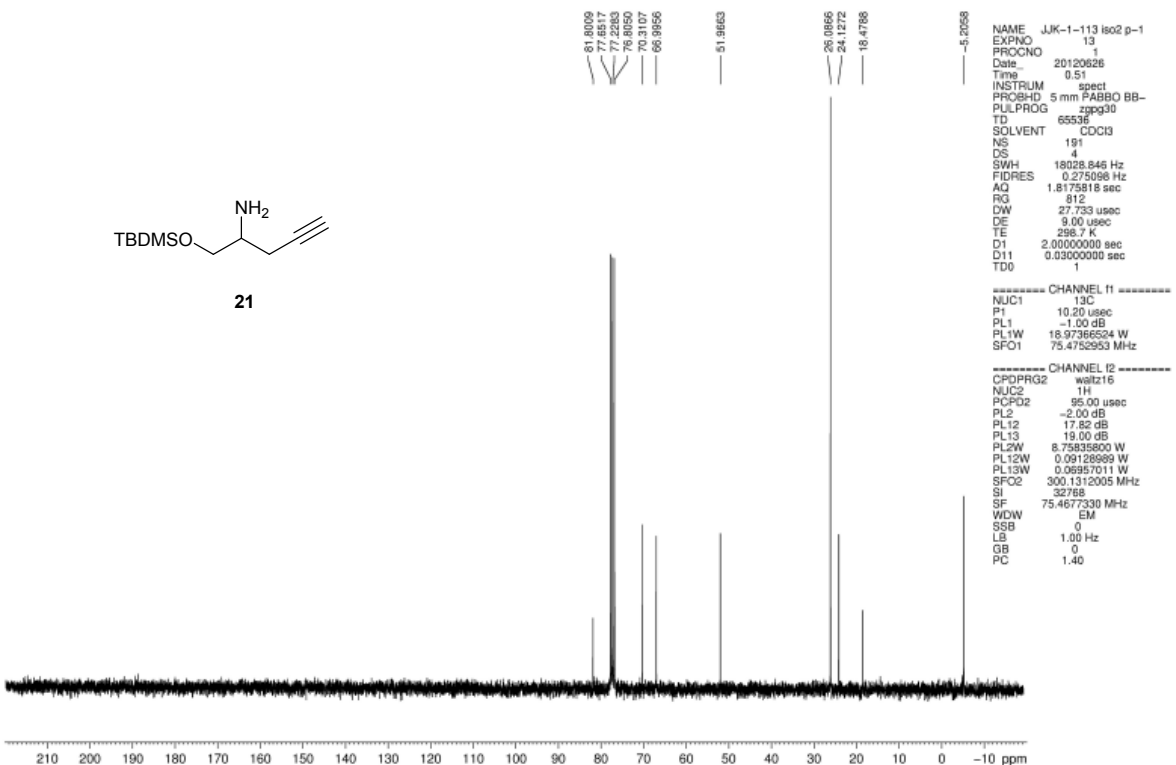

WJ-5-137-P 4 1 yhr 20120622

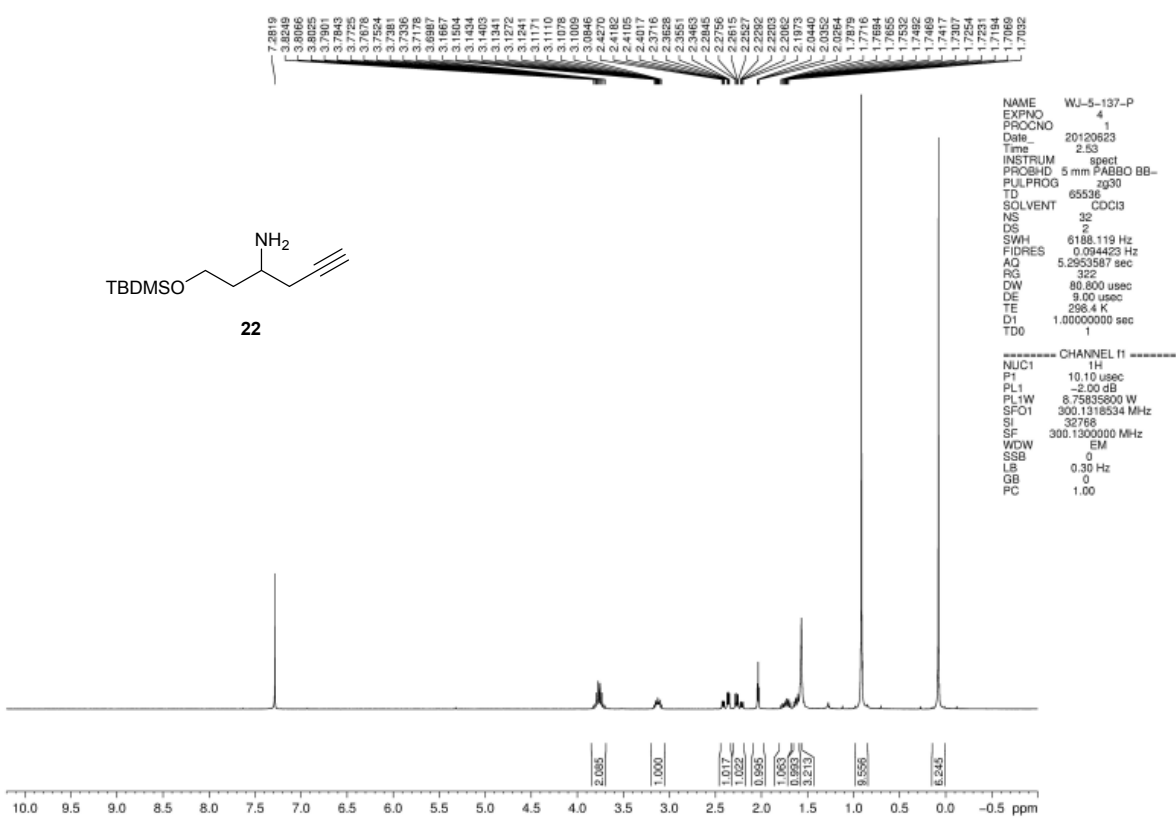

WJ-5-137-P 13 1 yhr 20120618

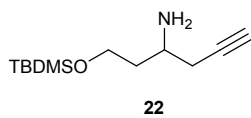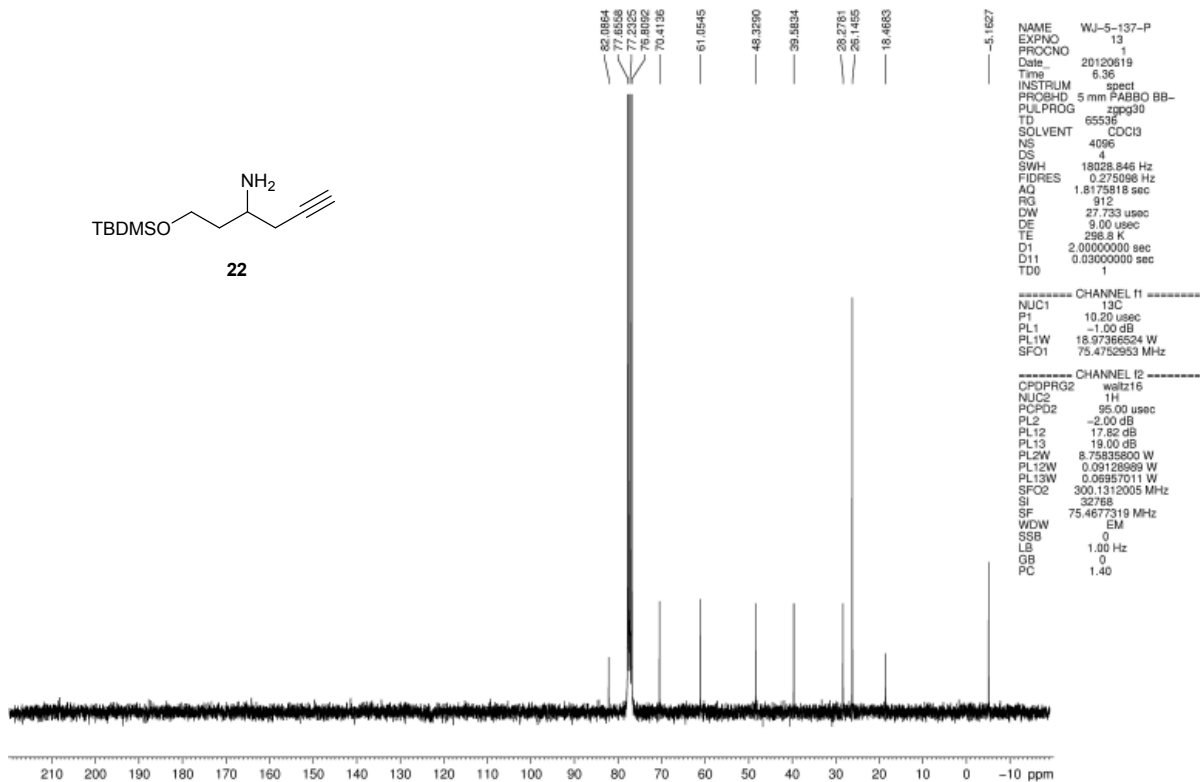

```

NAME      WJ-5-137-P
EXPNO    13
PROCNO   1
Date_    20120619
Time     6.36
INSTRUM  spect
PROBHD   5 mm PABBO BB-
PULPROG  zgpg30
TD        65536
SOLVENT  CDCl3
NS        4
DS        4
SWH      18028.848 Hz
FIDRES   0.275098 Hz
AQ        1.8175818 sec
RG        912
DW        27.733 usec
DE        9.00 usec
TE        298.8 K
D1        2.00000000 sec
D11       0.03000000 sec
TDO
----- CHANNEL f1 -----
NUC1      13C
P1         10.20 usec
PL1        -1.00 dB
PL1W      18.97366504 W
SFO1      75.4763553 MHz

----- CHANNEL f2 -----
CPOPRG2   waltz16
NUC2       1H
PCPD2     95.00 usec
PL2        -2.00 dB
PL12       17.88 dB
PL13       19.00 dB
PL2W      8.75835800 W
PL12W     0.09128698 W
PL13W     0.08857011 W
SFO2     300.1312005 MHz
SI         32768
SF        75.4677319 MHz
WDW        EM
SSB         0
LB         1.00 Hz
GB         0
PC         1.40
    
```

WJ-5-145-P 5 1 yhr 20120717

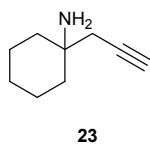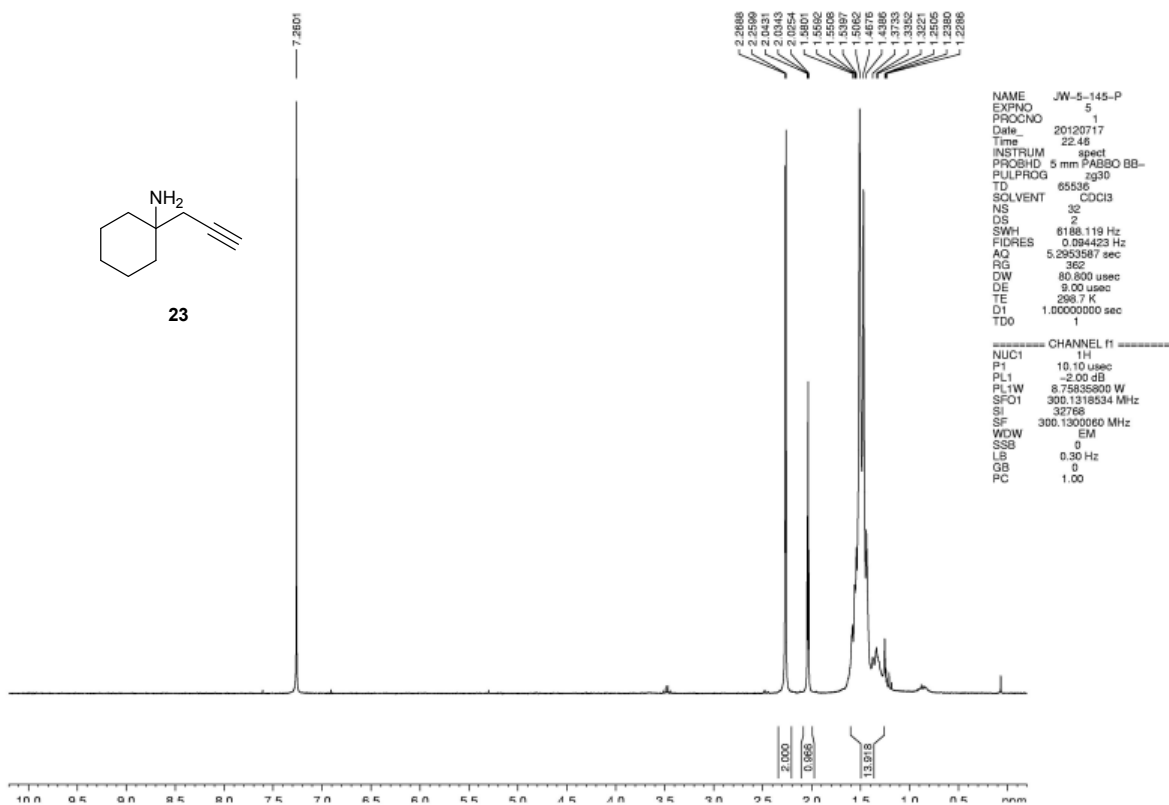

```

NAME      JW-5-145-P
EXPNO    5
PROCNO   1
Date_    20120717
Time     22.48
INSTRUM  spect
PROBHD   5 mm PABBO BB-
PULPROG  zg30
TD        65536
SOLVENT  CDCl3
NS        32
DS        2
SWH      8188.119 Hz
FIDRES   0.094423 Hz
AQ        5.2953587 sec
RG        352
DW        80.800 usec
DE        9.00 usec
TE        298.7 K
D1        1.00000000 sec
TDO
----- CHANNEL f1 -----
NUC1      1H
P1         10.10 usec
PL1        -2.00 dB
PL1W      8.75835800 W
SFO1     300.1318534 MHz
SI         32768
SF        300.1300060 MHz
WDW        EM
SSB         0
LB         0.30 Hz
GB         0
PC         1.00
    
```

WJ-5-145-P 16 1 yhr 20120723

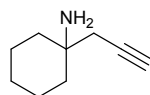

23

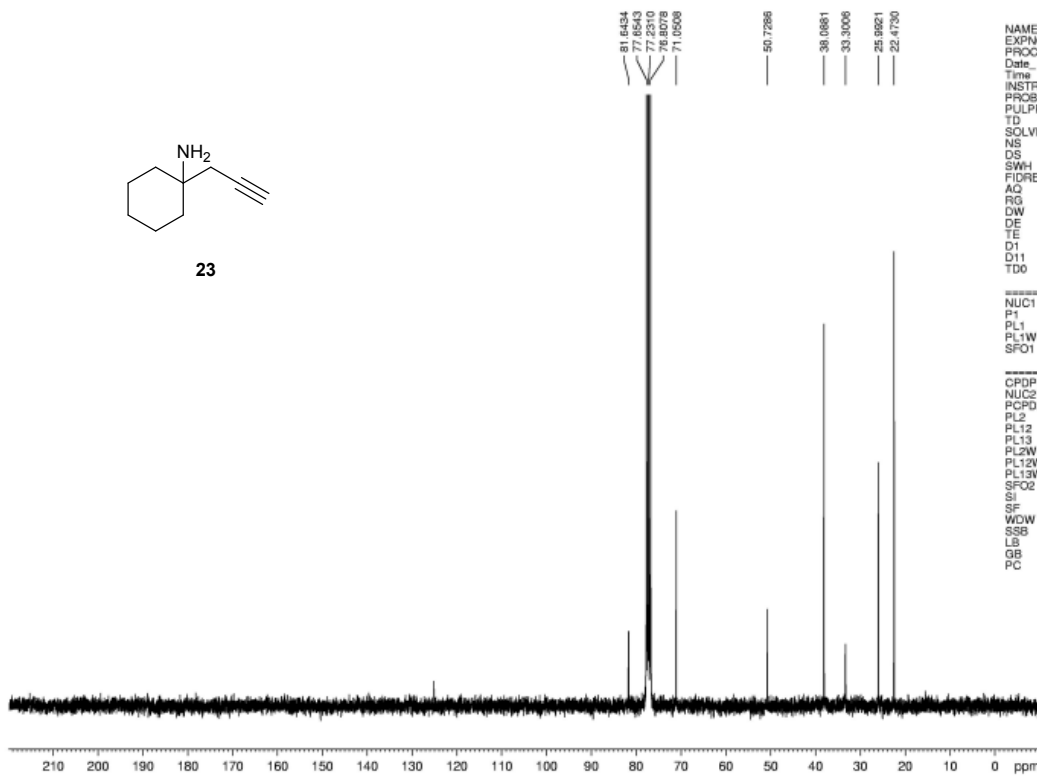

NAME WJ-5-145-P  
 EXPNO 16  
 PROCNO 1  
 Date\_ 20120724  
 Time 7.38  
 INSTRUM spect  
 PROBHD 5 mm PABBO BB-  
 PULPROG zgpg30  
 TD 65536  
 SOLVENT CDCl3  
 NS 5192  
 DS 4  
 SWH 18028.846 Hz  
 FIDRES 0.275098 Hz  
 AQ 1.8175818 sec  
 RG 1030  
 DW 27.733 usec  
 DE 9.00 usec  
 TE 298.7 K  
 D1 2.00000000 sec  
 D11 0.03000000 sec  
 TD0 1

===== CHANNEL f1 =====  
 NUC1 13C  
 P1 10.20 usec  
 PL1 -1.00 dB  
 PL1W 18.97366524 W  
 SFO1 75.4752953 MHz  
 ===== CHANNEL f2 =====  
 CPDPRG2 waltz16  
 NUC2 1H  
 FCPD2 95.00 usec  
 PL2 -2.00 dB  
 PL12 17.82 dB  
 PL13 19.00 dB  
 PL2W 8.75835800 W  
 PL12W 0.09128989 W  
 PL13W 0.06857011 W  
 SFO2 300.1312005 MHz  
 SI 32768  
 SF 75.4677324 MHz  
 WDW EM  
 SSB 0  
 LB 1.00 Hz  
 GB 0  
 PC 1.40

ljh-04-035 1 1 yhr 20120518

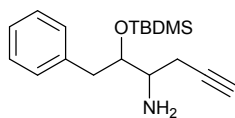

24

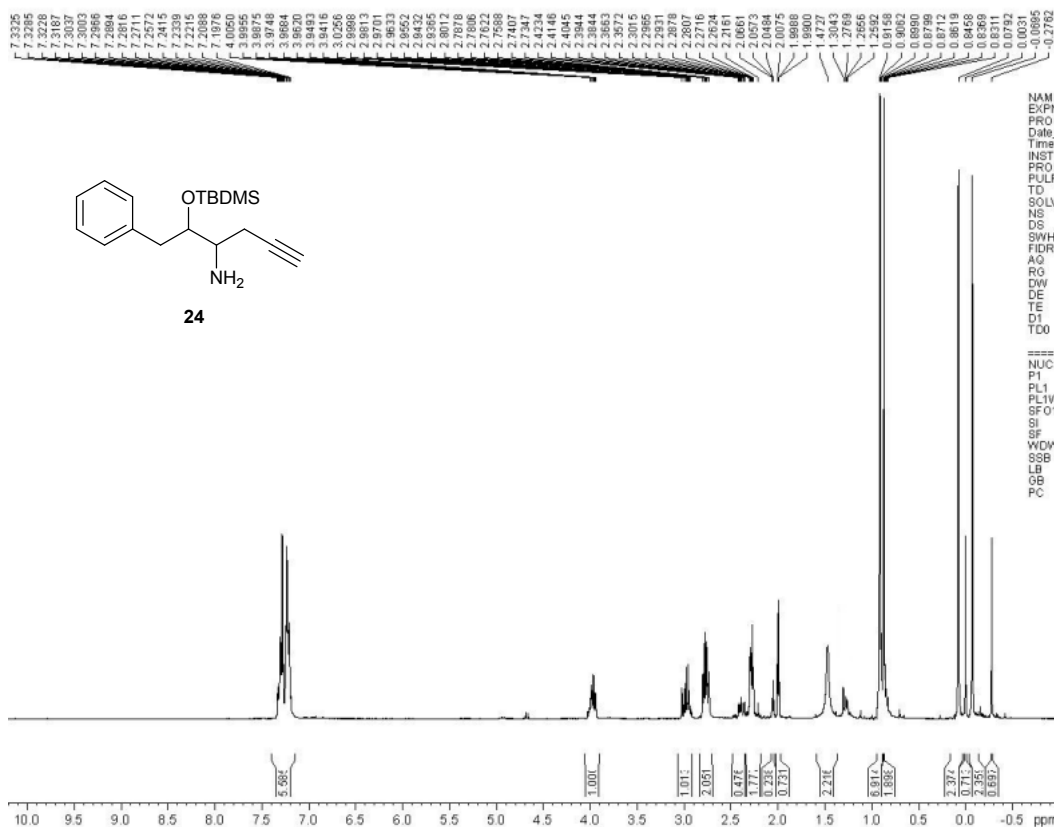

NAME ljh-04-035  
 EXPNO 1  
 PROCNO 1  
 Date\_ 20120518  
 Time 17.00  
 INSTRUM spect  
 PROBHD 5 mm PABBO BB-  
 PULPROG zg30  
 TD 65536  
 SOLVENT CDCl3  
 NS 16  
 DS 2  
 SWH 6188.119 Hz  
 FIDRES 0.094423 Hz  
 AQ 5.2953587 sec  
 RG 101  
 DW 80.800 usec  
 DE 9.00 usec  
 TE 297.4 K  
 D1 1.00000000 sec  
 TD0 1

===== CHANNEL f1 =====  
 NUC1 1H  
 P1 10.10 usec  
 PL1 -2.00 dB  
 PL1W 8.75835800 W  
 SFO1 300.13119534 MHz  
 SI 32768  
 SF 300.1300000 MHz  
 WDW EM  
 SSB 0  
 LB 0.30 Hz  
 GB 0  
 PC 1.00

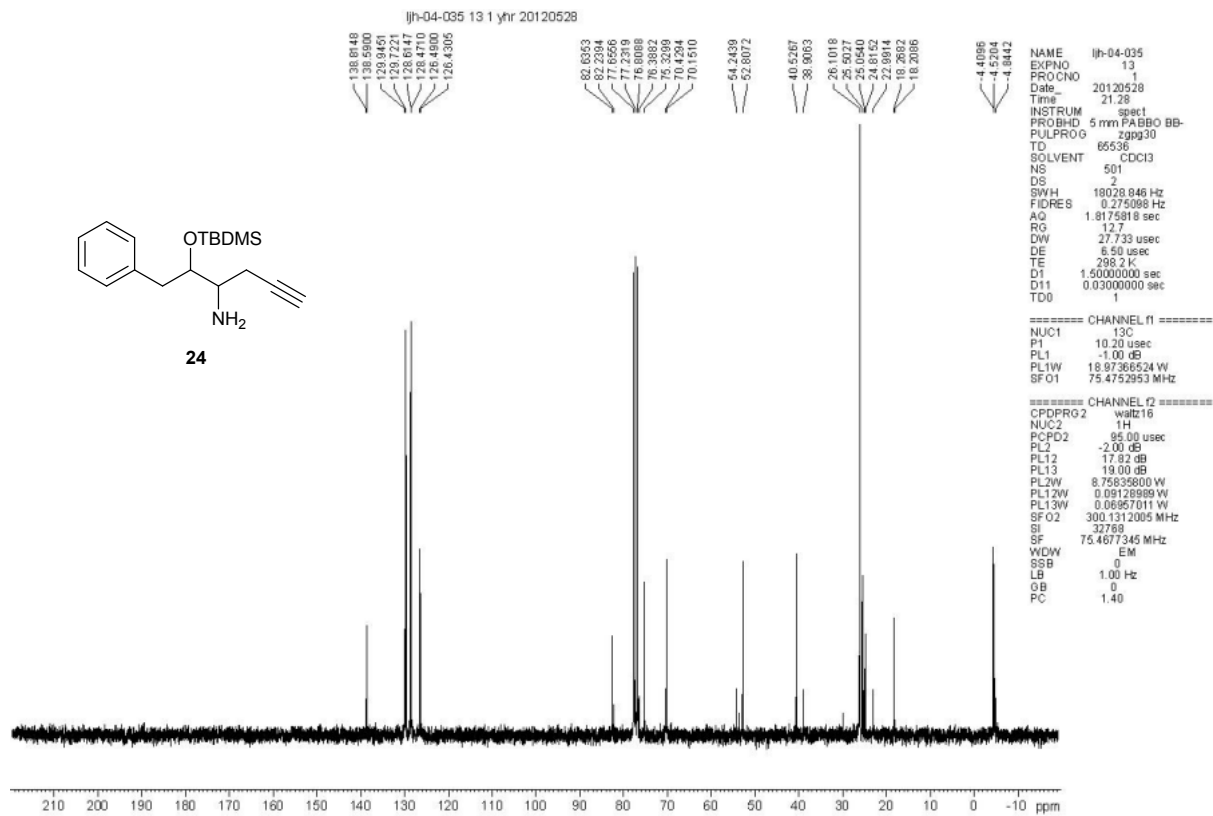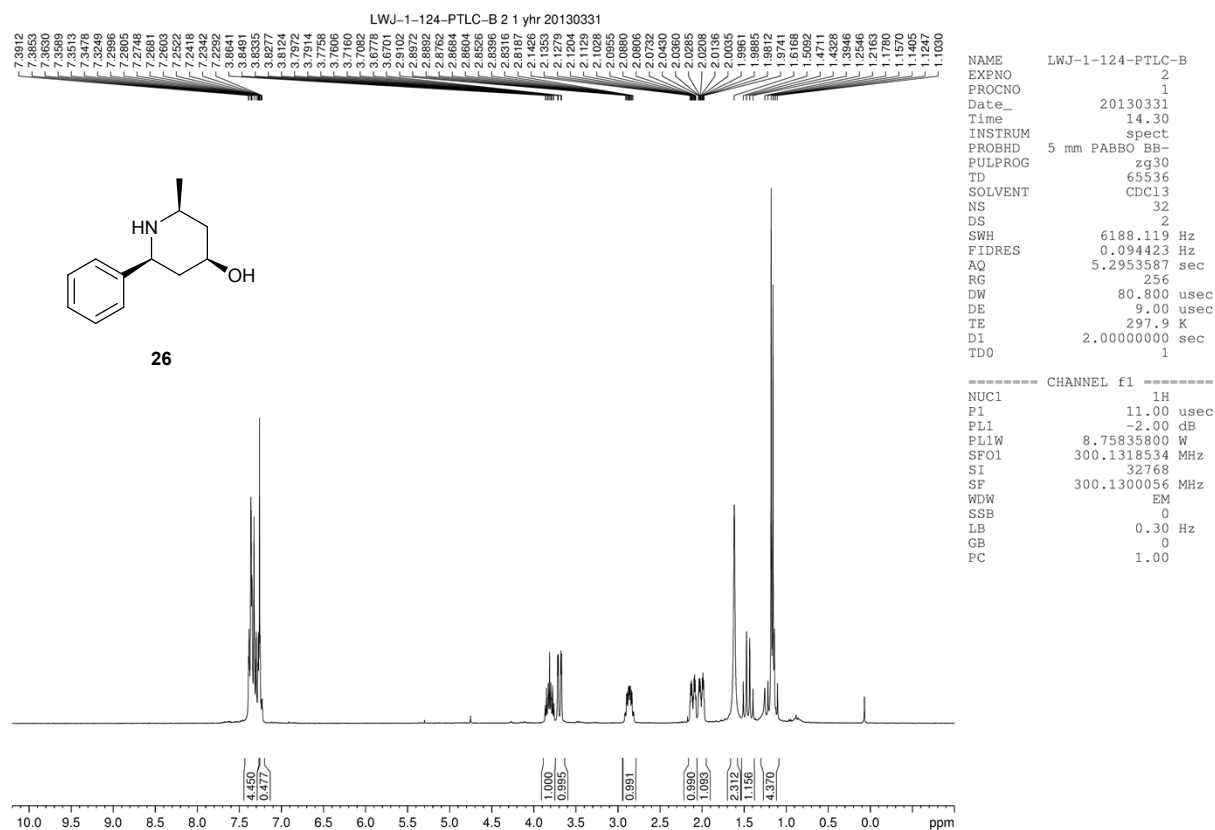



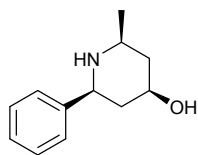

26

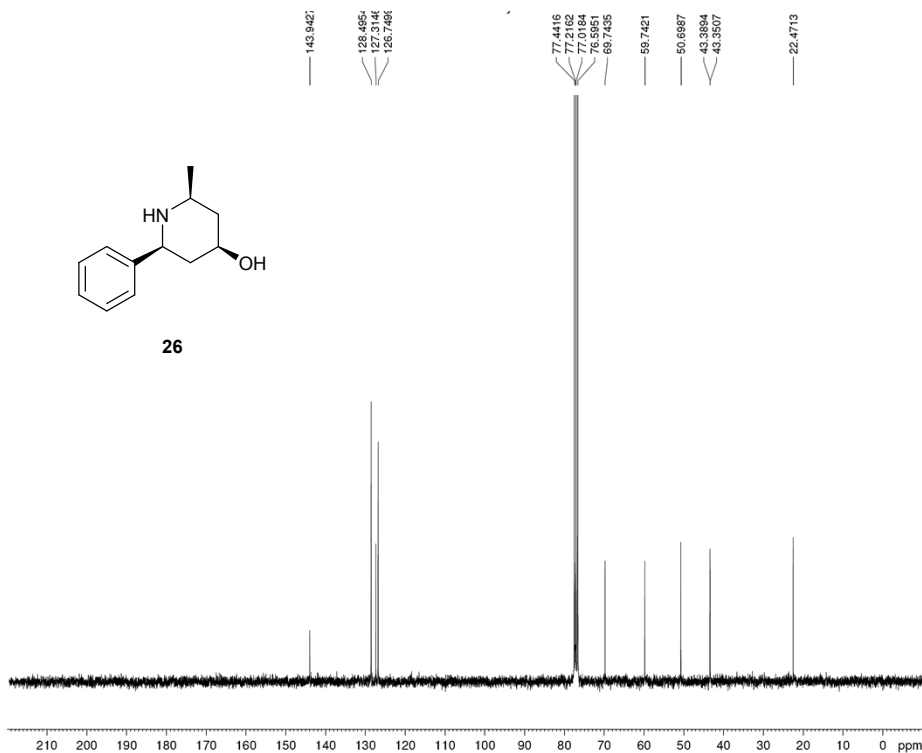

```

NAME LWJ-1-124-PTLC-B
EXPNO 13
PROCNO 1
Date_ 20130401
Time 12.01
INSTRUM spect
PROBHD 5 mm PABBO BB-
PULPROG zgpg30
TD 65536
SOLVENT CDCl3
NS 1024
DS 4
SWH 18028.846 Hz
FIDRES 0.275098 Hz
AQ 1.8175818 sec
RG 912
DW 27.733 usec
DE 9.00 usec
TE 298.6 K
D1 2.0000000 sec
D11 0.0300000 sec
TDO 1

```

```

===== CHANNEL f1 =====
NUC1 13C
P1 10.20 usec
PL1 -1.00 dB
PL1W 18.97366524 W
SFO1 75.4752953 MHz

```

```

===== CHANNEL f2 =====
CPDPRG2 waltz16
NUC2 1H
PCPD2 95.00 usec
PL2 -2.00 dB
PL12 16.73 dB
PL13 19.00 dB
PL2W 8.75835800 W

```
